# Supplementary material
Source: PubMed Central journal article supplement (PMC4862729)
Supplement: IAI.01410-15_zii999091705so1.pdf [file IAI.01410-15_zii999091705so1.pdf]

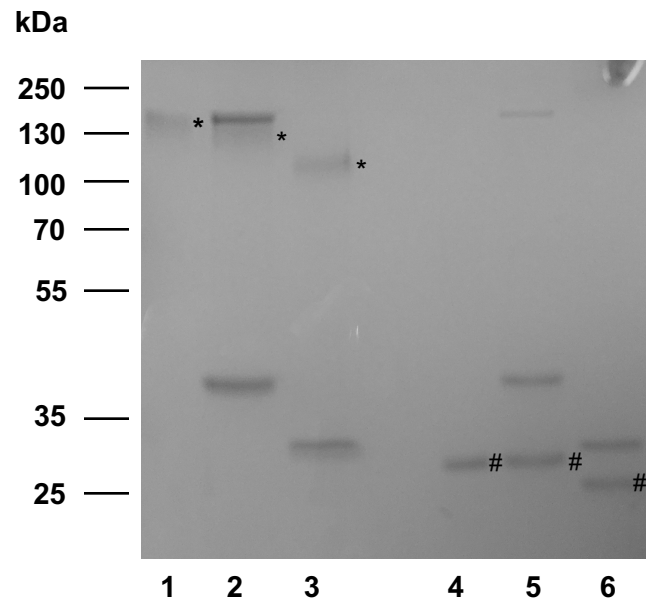

**Fig S1. CpClec-Fc is post-translationally modified by O- and N-glycosylation.** Recombinant CpClec-Fc (lanes 1-3) or Fc alone (lanes 5-7) were incubated with neuraminidase and O-glycosidase (lanes 2 and 6) or PNGaseF (lanes 3 and 7) and analyzed by SDS-PAGE and Coomassie blue staining. CpClec-Fc is marked with “\*”. Fc alone is marked with “#”. Additional bands are neuraminidase (43 kDa), O-glycosidase (147 kDa), and PNGase F (36 kDa).

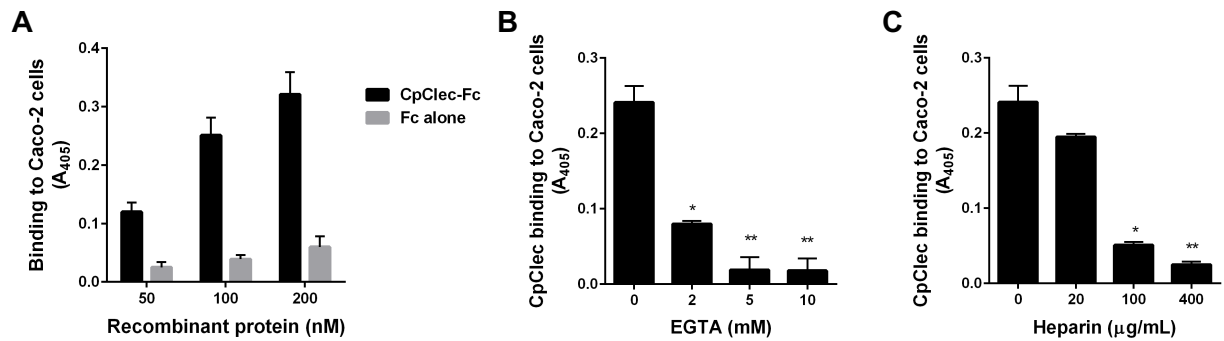

**Fig S2. CpClec-Fc binding to Caco-2 cells is dose-dependent, calcium-dependent, and inhibited by heparin.** A: Fixed Caco-2 cells were incubated with CpClec-Fc or Fc alone, and binding was quantified by ELISA. B and C: CpClec-Fc or Fc alone were incubated with (B) EGTA or (C) heparin, and binding was quantified by ELISA. CpClec-Fc binding was normalized to binding of Fc alone. Data represent mean + SEM. \*  $P < 0.05$ , \*\*  $P < 0.005$  compared to binding in the control (buffer or medium alone).

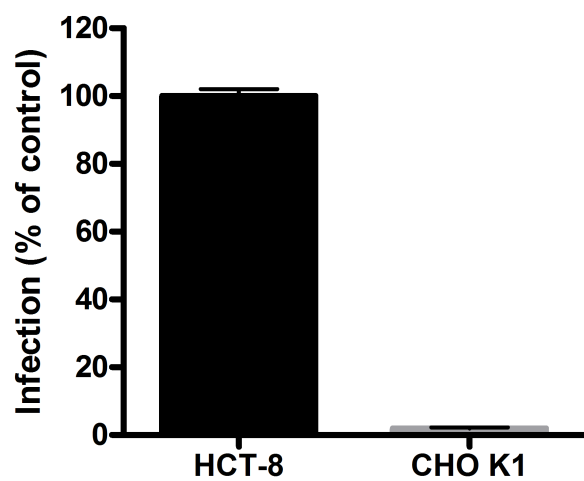

**Fig S3. *C. parvum* does not infect CHO K1 cells.** HCT-8 and CHO K1 cells were infected with *C. parvum* oocysts and infection quantified by fluorescence microscopy. Data represent mean + SEM.

**Table S1. CpClec-Fc does not bind to glycans present on the Consortium for Functional Glycomics glycan array.**

| Glycan                                                                                                                                                 | AvgMeanS-B w/o MIN/MAX | StDev |
|--------------------------------------------------------------------------------------------------------------------------------------------------------|------------------------|-------|
| Neu5Acb-Sp8                                                                                                                                            | 1195                   | 525   |
| GlcNAca1-4Galb1-3GalNAc-Sp14                                                                                                                           | 1088                   | 130   |
| GlcNAcb1-4GlcNAcb-Sp10                                                                                                                                 | 638                    | 29    |
| GlcNAca1-4Galb1-4GlcNAcb1-3Galb1-4GlcNAcb-                                                                                                             | 138                    | 21    |
| GlcNAca1-4Galb1-4GlcNAcb1-3Galb1-4GlcNAcb1-3Galb1-4GlcNAcb-Sp0                                                                                         | 109                    | 23    |
| Neu5Aca2-8Neu5Aca2-8Neu5Acb-Sp8                                                                                                                        | 76                     | 77    |
| Galb1-4GlcNAcb1-6(Galb1-3)GalNAc-Sp14                                                                                                                  | 59                     | 34    |
| Gala1-3(Fuca1-2)Galb1-4GlcNAcb1-6(Gala1-3(Fuca1-2)Galb1-4GlcNAcb1-3)GalNAc-Sp14                                                                        | 58                     | 26    |
| Glca1-4Glc-Sp8                                                                                                                                         | 57                     | 15    |
| GlcNAcb1-3Galb1-4GlcNAcb1-2Mana1-6(GlcNAcb1-3Galb1-4GlcNAcb1-2Mana1-3)Manb1-4GlcNAcb1-4(Fuca1-6)GlcNAcb-Sp24                                           | 57                     | 39    |
| Gala-Sp8                                                                                                                                               | 53                     | 18    |
| GlcNAca1-4Galb1-4GlcNAcb1-3Galb1-4(Fuca1-3)GlcNAcb1-3Galb1-4(Fuca1-3)GlcNAcb-Sp0                                                                       | 53                     | 19    |
| Galb1-4(Fuca1-3)GlcNAcb1-2Mana1-6(Galb1-4(Fuca1-3)GlcNAcb1-2Mana1-3)Manb1-4GlcNAcb1-4(Fuca1-6)GlcNAcb-Sp22                                             | 51                     | 39    |
| Galb1-4GlcNAcb1-3Galb1-4GlcNAcb1-6(Galb1-4GlcNAcb1-3Galb1-4GlcNAcb1-2)Mana1-6(Galb1-4GlcNAcb1-3Galb1-4GlcNAcb1-2Mana1-                                 | 48                     | 12    |
| Fuca1-2Galb1-4GlcNAcb1-6GalNAca-Sp14                                                                                                                   | 47                     | 20    |
| Galb1-4GlcNAcb1-3Galb1-4GlcNAcb1-3Galb1-4GlcNAcb1-3Galb1-4GlcNAcb1-2Mana1-6(Galb1-4GlcNAcb1-3Galb1-4GlcNAcb1-3Galb1-4GlcNAcb1-3Galb1-4GlcNAcb1-2Mana1- | 45                     | 22    |
| Galb1-3GlcNAcb1-2Mana-Sp0                                                                                                                              | 43                     | 21    |
| Neu5Aca2-6(Neu5Aca2-3)GalNAca-Sp8                                                                                                                      | 40                     | 21    |
| Neu5Gca2-3Galb1-3GlcNAcb-Sp0                                                                                                                           | 40                     | 13    |
| Neu5Aca2-3Galb1-4GlcNAcb1-6(Galb1-                                                                                                                     | 40                     | 28    |
| Neu5Aca2-6Galb1-4Glc-Sp0                                                                                                                               | 37                     | 33    |
| GlcNAca1-4Galb1-4GlcNAcb-Sp0                                                                                                                           | 37                     | 26    |
| GalNAcb1-3Gala1-4Galb1-4GlcNAcb-Sp0                                                                                                                    | 35                     | 20    |
| (3S)GlcAb1-3Galb1-4GlcNAcb1-2Mana-Sp0                                                                                                                  | 35                     | 23    |
| Galb1-4(6S)Glc-Sp0                                                                                                                                     | 35                     | 17    |

|                                                                                                                                                        |    |    |
|--------------------------------------------------------------------------------------------------------------------------------------------------------|----|----|
| Galb1-4GlcNAcb1-3Galb1-4GlcNAcb1-3Galb1-4GlcNAcb1-3Galb1-4GlcNAcb1-2Mana1-6(Galb1-4GlcNAcb1-3Galb1-4GlcNAcb1-3Galb1-4GlcNAcb1-3Galb1-4GlcNAcb1-2Mana1- | 34 | 37 |
| Fuca1-2(6S)Galb1-3(6S)GlcNAcb-Sp0                                                                                                                      | 34 | 17 |
| GlcNAcb1-2Mana1-6(GlcNAcb1-4(GlcNAcb1-2)Mana1-3)Manb1-4GlcNAcb1-4GlcNAc-Sp21                                                                           | 34 | 24 |
| Galb1-4(Fuca1-3)(6S)Glc-Sp0                                                                                                                            | 33 | 19 |
| Neu5Aca2-3Galb1-4GlcNAcb1-3Galb-Sp8                                                                                                                    | 32 | 25 |
| KDNa2-3Galb1-3GlcNAcb-Sp0                                                                                                                              | 31 | 16 |
| (3S)GlcAb1-3Galb1-4GlcNAcb1-3Galb1-4Glc-Sp0                                                                                                            | 31 | 14 |
| Galb1-4GlcNAcb1-3Galb1-4GlcNAcb1-3GalNAca-                                                                                                             | 31 | 15 |
| Neu5Aca2-3Galb1-4GlcNAcb1-2Mana-Sp0                                                                                                                    | 30 | 12 |
| Galb1-4(Fuca1-3)GlcNAcb1-6GalNAc-Sp14                                                                                                                  | 30 | 36 |
| Neu5Aca2-3Galb1-3(Fuca1-4)GlcNAcb1-3Galb1-3(Fuca1-4)GlcNAcb-Sp0                                                                                        | 30 | 8  |
| Neu5Gca2-8Neu5Gca2-6Galb1-4GlcNAc-Sp0                                                                                                                  | 30 | 18 |
| (3S)GalNAcb1-4(Fuca1-3)GlcNAcb-Sp8                                                                                                                     | 30 | 22 |
| Galb1-3GalNAcb-Sp8                                                                                                                                     | 30 | 18 |
| Galb1-3GalNAcb1-4(Neu5Aca2-8Neu5Aca2-8Neu5Aca2-3)Galb1-4Glc-Sp21                                                                                       | 29 | 14 |
| Galb1-4GlcNAcb1-3GalNAc-Sp14                                                                                                                           | 29 | 30 |
| Galb1-4GlcNAcb1-3Galb1-4GlcNAcb1-2Mana1-6(Galb1-4GlcNAcb1-3Galb1-4GlcNAcb1-2Mana1-3)Manb1-4GlcNAcb1-4GlcNAcb-Sp24                                      | 29 | 16 |
| Galb1-4(6P)GlcNAcb-Sp0                                                                                                                                 | 28 | 21 |
| Neu5Aca2-3Galb1-4GlcNAcb1-3Galb1-4GlcNAcb1-3Galb1-4GlcNAcb1-2Mana1-6(Neu5Aca2-3Galb1-4GlcNAcb1-3Galb1-4GlcNAcb1-3Galb1-4GlcNAcb1-2Mana1-               | 28 | 3  |
| Gala1-3Galb1-3GlcNAcb1-3GalNAc-Sp14                                                                                                                    | 28 | 16 |
| Gala1-3Galb1-3(Fuca1-4)GlcNAcb1-2Mana1-6(Gala1-3Galb1-3(Fuca1-4)GlcNAcb1-2Mana1-3)Manb1-4GlcNAcb1-4GlcNAc-Sp19                                         | 28 | 17 |

|                                                                                                                                                                                       |    |    |
|---------------------------------------------------------------------------------------------------------------------------------------------------------------------------------------|----|----|
| GlcNAcb1-3Galb1-4GlcNAcb1-3Galb1-4GlcNAcb1-3Galb1-4GlcNAcb1-2Mana1-6(GlcNAcb1-3Galb1-4GlcNAcb1-3Galb1-4GlcNAcb1-3Galb1-4GlcNAcb1-2Mana1-                                              | 28 | 16 |
| Galb1-4GlcNAcb1-3Galb1-4GlcNAcb1-6(Galb1-4GlcNAcb1-3Galb1-4GlcNAb1-2)Mana1-6(Galb1-4GlcNAcb1-3Galb1-4GlcNAcb1-2Mana1-3)Manb1-4GlcNAcb1-4(Fuca1-6)GlcNAcb-Sp24                         | 28 | 10 |
| Fuca-Sp8                                                                                                                                                                              | 27 | 17 |
| Fuca1-2Galb1-3GlcNAcb1-2Mana1-6(Fuca1-2Galb1-3GlcNAcb1-2Mana1-3)Manb1-                                                                                                                | 27 | 24 |
| Neu5Aca2-3Galb1-4GlcNAcb-Sp0                                                                                                                                                          | 27 | 11 |
| GlcNAcb1-3Galb1-4GlcNAcb1-3Galb1-4GlcNAcb1-3Galb1-4GlcNAcb1-3Galb1-4GlcNAcb1-6(GlcNAcb1-3Galb1-4GlcNAcb1-3Galb1-4GlcNAcb1-3Galb1-4GlcNAb1-2)Mana1-6(GlcNAcb1-3Galb1-4GlcNAcb1-3Galb1- | 27 | 18 |
| Gala1-3Galb1-4GlcNAcb1-6GalNAca-Sp14                                                                                                                                                  | 27 | 14 |
| Galb1-4GlcNAca1-6Galb1-4GlcNAcb-Sp0                                                                                                                                                   | 26 | 26 |
| Gala1-3Galb1-3GlcNAcb-Sp0                                                                                                                                                             | 26 | 13 |
| Fuca1-2Galb1-4(6S)Glc-Sp0                                                                                                                                                             | 26 | 9  |
| Gala1-3(Fuca1-2)Galb1-3GlcNAcb1-2Mana1-6(Gala1-3(Fuca1-2)Galb1-3GlcNAcb1-2Mana1-3)Manb1-4GlcNAcb1-4GlcNAcb-Sp20                                                                       | 26 | 31 |
| Galb1-3GlcNAcb1-2Mana1-6(Galb1-3GlcNAcb1-2Mana1-3)Manb1-4GlcNAcb1-4(Fuca1-                                                                                                            | 26 | 15 |
| Galb1-3GlcNAcb1-3Galb1-4GlcNAcb1-6(Galb1-3GlcNAcb1-3Galb1-4GlcNAb1-2)Mana1-6(Galb1-3GlcNAcb1-3Galb1-4GlcNAcb1-2Mana1-3)Manb1-4GlcNAcb1-4(Fuca1-6)GlcNAcb-Sp24                         | 26 | 20 |
| GlcNAb1-3Galb1-3GalNAc-Sp14                                                                                                                                                           | 25 | 14 |
| Galb1-4(Fuca1-3)GlcNAcb-Sp0                                                                                                                                                           | 25 | 4  |
| Galb1-4(Fuca1-3)GlcNAcb1-6(Fuca1-2Galb1-4GlcNAcb1-3)Galb1-4Glc-Sp21                                                                                                                   | 25 | 17 |
| Mana1-6Manb-Sp10                                                                                                                                                                      | 25 | 12 |

|                                                                                                                                                      |    |    |
|------------------------------------------------------------------------------------------------------------------------------------------------------|----|----|
| Neu5Aca2-3Galb1-3GlcNAcb1-3GalNAca-Sp14                                                                                                              | 24 | 15 |
| GalNAca1-3(Fuca1-2)Galb1-4GlcNAcb1-2Mana1-6(GalNAca1-3(Fuca1-2)Galb1-4GlcNAcb1-2Mana1-3)Manb1-4GlcNAcb1-4GlcNAcb-Sp20                                | 24 | 22 |
| (3S)Galb1-3(Fuca1-4)GlcNAcb-Sp8                                                                                                                      | 24 | 16 |
| Gala1-3Galb1-4Glc-Sp10                                                                                                                               | 24 | 18 |
| Neu5Aca2-3Galb1-4Glc-Sp8                                                                                                                             | 24 | 13 |
| Fuca1-2Galb1-4(Fuca1-3)GlcNAcb1-2Mana1-6(Fuca1-2Galb1-4(Fuca1-3)GlcNAcb1-2Mana1-3)Manb1-4GlcNAcb1-4(Fuca1-6)GlcNAcb-Sp24                             | 24 | 15 |
| Galb1-4GlcNAcb1-6(Galb1-4GlcNAcb1-2)Mana1-6(GlcNAcb1-4)(Galb1-4GlcNAcb1-2Mana1-3)Manb1-4GlcNAcb1-4GlcNAc-Sp21                                        | 24 | 14 |
| Neu5Aca2-3Galb1-4(Neu5Aca2-3Galb1-                                                                                                                   | 24 | 36 |
| Neu5Aca2-3Galb1-4GlcNAcb1-4Mana1-6(GlcNAcb1-4)(Neu5Aca2-3Galb1-4GlcNAcb1-4(Neu5Aca2-3Galb1-4GlcNAcb1-2)Mana1-                                        | 24 | 12 |
| GlcNAcb1-3Galb1-4GlcNAcb1-3Galb1-4GlcNAcb1-6(GlcNAcb1-3Galb1-4GlcNAcb1-3Galb1-4GlcNAcb1-2)Mana1-6(GlcNAcb1-3Galb1-4GlcNAcb1-3Galb1-4GlcNAcb1-2Mana1- | 23 | 26 |
| Neu5Aca2-3Galb1-3GlcNAcb1-2Mana1-6(GlcNAcb1-4)(Neu5Aca2-3Galb1-3GlcNAcb1-2Mana1-3)Manb1-4GlcNAcb1-4GlcNAc-Sp21                                       | 23 | 19 |
| GlcNAcb1-3Galb1-4GlcNAcb1-3Galb1-4GlcNAcb1-2Mana1-6(GlcNAcb1-3Galb1-4GlcNAcb1-3Galb1-4GlcNAcb1-2Mana1-                                               | 23 | 24 |
| Neu5Aca2-3Galb1-3GlcNAcb-Sp8                                                                                                                         | 23 | 10 |
| Neu5Aca2-6Galb1-4GlcNAcb1-6(Galb1-3GlcNAcb1-3)Galb1-4Glc-Sp21                                                                                        | 23 | 12 |
| Mana1-6(Neu5Aca2-6Galb1-4GlcNAcb1-2Mana1-3)Manb1-4GlcNAcb1-4GlcNAc-Sp12                                                                              | 23 | 18 |
| Neu5Aca2-3Galb1-3GlcNAcb1-2Mana1-6(Neu5Aca2-3Galb1-3GlcNAcb1-2Mana1-                                                                                 | 23 | 16 |

|                                                                                                                                                                                                                                                                                                                                                                                                                                                                 |    |    |
|-----------------------------------------------------------------------------------------------------------------------------------------------------------------------------------------------------------------------------------------------------------------------------------------------------------------------------------------------------------------------------------------------------------------------------------------------------------------|----|----|
| Galb1-4GlcNAcb1-3Galb1-4GlcNAcb1-3Galb1-4GlcNAcb1-3Galb1-4GlcNAcb1-2Mana1-6(Galb1-4GlcNAcb1-3Galb1-4GlcNAcb1-3Galb1-4GlcNAcb1-3Galb1-4GlcNAcb1-2Mana1-4GlcNAcb1-3Galb1-4GlcNAcb1-2Mana1-4GlcNAcb1-3Galb1-4GlcNAcb1-3Galb1-4GlcNAcb1-2Mana1-6(GlcNAcb1-4)(Galb1-3GlcNAcb1-2Mana1-3)Manb1-4GlcNAcb1-4GlcNAcb1-6(GlcNAcb1-2)Mana1-6(GlcNAcb1-2Mana1-3)Manb1-4GlcNAcb1-4(Fuca1-2Galb1-3GlcNAcb1-2Mana1-6(Fuca1-2Galb1-3GlcNAcb1-2Mana1-3)Manb1-4GlcNAcb1-3Fuca-Sp21 | 23 | 21 |
| GlcN(Gc)b-Sp8                                                                                                                                                                                                                                                                                                                                                                                                                                                   | 23 | 25 |
| Galb1-3GlcNAcb1-2Mana1-6(GlcNAcb1-4)(Galb1-3GlcNAcb1-2Mana1-3)Manb1-4GlcNAcb1-4GlcNAcb1-6(GlcNAcb1-2)Mana1-6(GlcNAcb1-2Mana1-3)Manb1-4GlcNAcb1-4(Fuca1-2Galb1-3GlcNAcb1-2Mana1-6(Fuca1-2Galb1-3GlcNAcb1-2Mana1-3)Manb1-4GlcNAcb1-3Fuca-Sp21                                                                                                                                                                                                                     | 23 | 13 |
| Rhaa-Sp8                                                                                                                                                                                                                                                                                                                                                                                                                                                        | 22 | 16 |
| (3S)Galb1-4(Fuca1-3)(6S)Glc-Sp0                                                                                                                                                                                                                                                                                                                                                                                                                                 | 22 | 24 |
| GlcNAcb1-3Galb1-4GlcNAcb1-3Galb1-4GlcNAcb1-3Galb1-4GlcNAcb1-2Mana1-6(GlcNAcb1-3Galb1-4GlcNAcb1-3Galb1-4GlcNAcb1-3Galb1-4GlcNAcb1-2Mana1-4GlcNAcb1-3Galb1-4GlcNAcb1-2Mana1-6(GlcNAcb1-2)Mana1-6(GlcNAcb1-2Mana1-3)Manb1-4GlcNAcb1-4(Fuca1-2Galb1-3GlcNAcb1-2Mana1-6(Fuca1-2Galb1-3GlcNAcb1-2Mana1-3)Manb1-4GlcNAcb1-3Fuca-Sp21                                                                                                                                   | 22 | 13 |
| GlcNAcb1-6(GlcNAcb1-2)Mana1-6(GlcNAcb1-2Mana1-3)Manb1-4GlcNAcb1-4(Fuca1-2Galb1-3GlcNAcb1-2Mana1-6(Fuca1-2Galb1-3GlcNAcb1-2Mana1-3)Manb1-4GlcNAcb1-3Fuca-Sp21                                                                                                                                                                                                                                                                                                    | 22 | 10 |
| (3S)Galb1-4(Fuca1-3)(6S)GlcNAcb-Sp8                                                                                                                                                                                                                                                                                                                                                                                                                             | 22 | 9  |
| Galb1-4GlcNAcb1-2Mana1-6(Galb1-4GlcNAcb1-2Mana1-3)Manb1-4GlcNAcb1-4(Fuca1-2Galb1-3GlcNAcb1-2Mana1-6(Fuca1-2Galb1-3GlcNAcb1-2Mana1-3)Manb1-4GlcNAcb1-3Fuca-Sp21                                                                                                                                                                                                                                                                                                  | 22 | 20 |
| Mana1-6(Mana1-3)Manb1-4GlcNAcb1-4GlcNAcb1-3Fuca-Sp21                                                                                                                                                                                                                                                                                                                                                                                                            | 22 | 9  |
| Fuca1-2Galb1-3GlcNAcb1-2Mana1-6(Fuca1-2Galb1-3GlcNAcb1-2Mana1-3)Manb1-4GlcNAcb1-3Fuca-Sp21                                                                                                                                                                                                                                                                                                                                                                      | 22 | 7  |
| KDNa2-6Galb1-4GlcNAc-Sp0                                                                                                                                                                                                                                                                                                                                                                                                                                        | 22 | 7  |
| GlcNAcb1-3Fuca-Sp21                                                                                                                                                                                                                                                                                                                                                                                                                                             | 22 | 14 |
| GlcNAcb1-3Galb1-4GlcNAcb1-3Galb1-4GlcNAcb1-3GalNAca-Sp14                                                                                                                                                                                                                                                                                                                                                                                                        | 22 | 19 |
| Fuca1-2Galb1-3GlcNAcb1-3GalNAc-Sp14                                                                                                                                                                                                                                                                                                                                                                                                                             | 22 | 13 |
| (6P)Mana-Sp8                                                                                                                                                                                                                                                                                                                                                                                                                                                    | 22 | 11 |
| Galb1-4(Fuca1-3)(6S)GlcNAcb-Sp0                                                                                                                                                                                                                                                                                                                                                                                                                                 | 21 | 10 |
| Fuca1-2Galb1-4(Fuca1-3)GlcNAcb1-2Mana1-6(Fuca1-2Galb1-4(Fuca1-3)GlcNAcb1-4(Fuca1-2Galb1-4(Fuca1-3)GlcNAcb1-2)Mana1-3)Manb1-4GlcNAcb1-3Galb1-4GlcNAcb1-6(GlcNAcb1-3Galb1-4GlcNAcb1-3)GalNAca-Sp14                                                                                                                                                                                                                                                                | 21 | 13 |
| GlcNAcb1-3Galb1-4GlcNAcb1-6(GlcNAcb1-3Galb1-4GlcNAcb1-3)GalNAca-Sp14                                                                                                                                                                                                                                                                                                                                                                                            | 21 | 13 |
| Galb1-4(Fuca1-3)GlcNAcb1-6(Galb1-3GlcNAcb1-3)Galb1-4Glc-Sp21                                                                                                                                                                                                                                                                                                                                                                                                    | 21 | 9  |



|                                                                                                                                                                                                                                                |    |    |
|------------------------------------------------------------------------------------------------------------------------------------------------------------------------------------------------------------------------------------------------|----|----|
| Galb1-4GlcNAcb1-3Galb1-4GlcNAcb1-2Mana1-6(Galb1-4GlcNAcb1-3Galb1-4GlcNAcb1-2Mana1-3)Manb1-4GlcNAcb1-4(Fuca1-6)GlcNAcb-Sp24                                                                                                                     | 21 | 17 |
| Gala1-3Galb1-4(Fuca1-3)GlcNAcb1-2Mana1-6(Gala1-3Galb1-4(Fuca1-3)GlcNAcb1-2Mana1-3)Manb1-4GlcNAcb1-4GlcNAcb-Sp20                                                                                                                                | 21 | 12 |
| Galb1-3GalNAca1-3(Fuca1-2)Galb1-4GlcNAcb-Sp24                                                                                                                                                                                                  | 21 | 17 |
| GlcNAcb1-3Galb1-4GlcNAcb1-3Galb1-4GlcNAcb1-3Galb1-4GlcNAcb1-2Mana1-6(GlcNAcb1-3Galb1-4GlcNAcb1-3Galb1-4GlcNAcb1-3Galb1-4GlcNAcb1-2Mana1-6)GlcNAcb1-3Galb1-4GlcNAcb1-2Mana1-6(GlcNAcb1-3Galb1-4GlcNAcb1-2Mana1-6)GalNAcb1-4(Fuca1-3)GlcNAcb-Sp0 | 21 | 11 |
| GlcNAcb1-3Galb1-4GlcNAcb1-2Mana1-6(GlcNAcb1-3Galb1-4GlcNAcb1-2Mana1-6)GalNAcb1-4(Fuca1-3)GlcNAcb-Sp0                                                                                                                                           | 21 | 14 |
| Galb1-3GlcNAcb1-3Galb1-3GlcNAcb-Sp0                                                                                                                                                                                                            | 20 | 19 |
| GlcNAca1-6Galb1-4GlcNAcb-Sp8                                                                                                                                                                                                                   | 20 | 18 |
| Galb1-3(Fuca1-4)GlcNAcb-Sp0                                                                                                                                                                                                                    | 20 | 28 |
| Galb1-3(Fuca1-4)GlcNAcb-Sp0                                                                                                                                                                                                                    | 20 | 13 |
| Neu5Aca2-6Galb1-4GlcNAcb1-3Galb1-4GlcNAcb-Sp0                                                                                                                                                                                                  | 20 | 11 |
| Neu5Aca2-3Galb1-4(Fuca1-3)GlcNAcb1-2Mana1-6Galb1-3(Fuca1-4)GlcNAcb1-6GalNAca-Sp14                                                                                                                                                              | 20 | 18 |
| GlcNAca1-4Galb1-3GlcNAcb-Sp0                                                                                                                                                                                                                   | 20 | 20 |
| GlcNAca1-4Galb1-3GlcNAcb-Sp0                                                                                                                                                                                                                   | 20 | 5  |
| Galb1-4GlcNAcb1-6(Fuca1-2Galb1-3GlcNAcb1-3)Galb1-4Glc-Sp21                                                                                                                                                                                     | 20 | 19 |
| GalNAca-Sp8                                                                                                                                                                                                                                    | 20 | 10 |
| Mana1-6(Galb1-4GlcNAcb1-2Mana1-3)Manb1-4GlcNAcb1-4GlcNAcb-Sp12                                                                                                                                                                                 | 20 | 10 |
| MurNAcb1-4GlcNAcb-Sp10                                                                                                                                                                                                                         | 20 | 15 |
| Gala1-2Galb-Sp8                                                                                                                                                                                                                                | 20 | 19 |
| Neu5Aca2-6GlcNAcb1-4GlcNAcb-Sp21                                                                                                                                                                                                               | 20 | 24 |
| GlcNAca1-4Galb1-4GlcNAcb1-3Galb1-4Glc-Sp0                                                                                                                                                                                                      | 20 | 18 |
| Galb1-4GlcNAcb1-3Galb1-4GlcNAcb1-3Galb1-4GlcNAcb1-2Mana1-6(Galb1-4GlcNAcb1-3Galb1-4GlcNAcb1-3Galb1-4GlcNAcb1-2Mana1-6)GlcNAcb1-3Galb1-4GlcNAcb1-2Mana1-6(Galb1-4GlcNAcb1-3Galb1-4GlcNAcb1-3Galb1-4GlcNAcb1-2Mana1-6)GalNAca-Sp14               | 19 | 6  |
| Galb1-4(Fuca1-3)GlcNAcb1-3GalNAca-Sp14                                                                                                                                                                                                         | 19 | 10 |
| Gala1-3(Fuca1-2)Galb1-4(Fuca1-3)GlcNAcb-Sp8                                                                                                                                                                                                    | 19 | 7  |
| Galb1-3GalNAcb1-3Gal-Sp21                                                                                                                                                                                                                      | 19 | 25 |
| Neu5Aca2-3Galb1-4(Fuca1-3)(6S)GlcNAcb-Sp8                                                                                                                                                                                                      | 19 | 14 |

|                                            |    |    |
|--------------------------------------------|----|----|
| Galb1-3GalNAcb1-3Gala1-4Galb1-4GlcB-Sp0    | 19 | 19 |
| Fuca1-2Galb1-3GalNAca1-3(Fuca1-2)Galb1-    | 19 | 9  |
| (3S)GalNAcb1-4(3S)GlcNAc-Sp8               | 19 | 3  |
| Neu5Aca2-6Galb1-4GlcNAcb1-2Mana1-          |    |    |
| 6(Neu5Aca2-3Galb1-4GlcNAcb1-2Mana1-        | 19 | 20 |
| 6S(3S)Galb1-4GlcNAcb-Sp0                   | 19 | 3  |
| (3S)Galb1-4(Fuca1-3)GlcNAc-Sp8             | 19 | 17 |
| Neu5,9Ac2a2-3Galb1-4GlcNAcb-Sp0            | 19 | 15 |
| GlcNAcb1-3Galb1-4GlcB-Sp0                  | 19 | 21 |
| Galb1-4GlcNAcb1-6(Galb1-4GlcNAcb1-2)Mana1- |    |    |
| 6(GlcNAcb1-4)Galb1-4GlcNAcb1-4(Gal b1-     |    |    |
| 4GlcNAcb1-2)Mana1-3)Manb1-4GlcNAcb1-       | 18 | 17 |
| GlcNAcb1-2Mana1-6(GlcNAcb1-4)(GlcNAcb1-    |    |    |
| 2Mana1-3)Manb1-4GlcNAcb1-4GlcNAc-Sp21      | 18 | 13 |
| GlcNAcb1-6(GlcNAcb1-3)Galb1-4GlcNAcb-Sp8   | 18 | 10 |
| Galb1-4GlcNAcb1-6(Neu5Aca2-6Galb1-         |    |    |
| 3GlcNAcb1-3)Galb1-4Glc-Sp21                | 18 | 9  |
| Gala1-3(Fuca1-2)Galb1-3GlcNAcb1-3GalNAc-   | 18 | 18 |
| GlcNAcb1-4GlcNAcb1-4GlcNAcb1-4GlcNAcb1-    |    |    |
| 4GlcNAcb1-4GlcNAcb1-Sp8                    | 18 | 10 |
| Fuca1-2(6S)Galb1-4GlcB-Sp0                 | 18 | 29 |
| Neu5Aca2-8Neu5Aca2-8Neu5Aca2-3Galb1-       | 18 | 14 |
| Neu5Aca2-3Galb1-4GlcNAcb1-3Galb1-          |    |    |
| 4GlcNAcb1-6(Galb1-3)GalNAca-Sp14           | 18 | 15 |
| Fuca1-2Galb1-4GlcNAcb-Sp0                  | 18 | 23 |
| Neu5Aca2-3GalNAca-Sp8                      | 18 | 15 |
| Gala1-3(Fuca1-2)Galb1-4GlcNAcb1-3GalNAca-  | 18 | 18 |
| (3S)Galb1-4(6S)GlcB-Sp0                    | 17 | 7  |
| Neu5Aca2-8Neu5Aca2-8Neu5Aca-Sp8            | 17 | 11 |
| (6S)Galb1-3GlcNAcb-Sp0                     | 17 | 7  |
| Neu5Aca2-6(Neu5Aca2-3Galb1-3)GalNAca-Sp8   | 17 | 23 |
| Neu5Aca2-3Galb1-4(Fuca1-3)GlcNAcb1-        |    |    |
| 6(Neu5Aca2-3Galb1-3)GalNAc-Sp14            | 17 | 9  |
| Galb1-3GlcNAca1-3Galb1-4GlcNAcb-Sp8        | 17 | 3  |
| Neu5Aca2-6Galb1-4GlcNAcb1-3Galb1-3GlcNAcb- | 17 | 16 |
| Galb1-4(Fuca1-3)GlcNAcb1-3Galb1-3(Fuca1-   | 17 | 11 |
| (3S)Galb1-4(Fuca1-3)GlcB-Sp0               | 17 | 13 |

|                                                                                                                                                  |    |    |
|--------------------------------------------------------------------------------------------------------------------------------------------------|----|----|
| Neu5Acb2-6GalNAca-Sp8                                                                                                                            | 17 | 11 |
| Neu5Aca2-3Galb1-3(Fuca1-4)GlcNAcb-Sp8                                                                                                            | 17 | 13 |
| Fuca-Sp9                                                                                                                                         | 17 | 14 |
| GlcNAcb1-3Galb1-4GlcNAcb1-3Galb1-4GlcNAcb1-2Mana1-6(GlcNAcb1-3Galb1-4GlcNAcb1-3Galb1-4GlcNAcb1-2Mana1-                                           | 17 | 5  |
| Fuca1-2Galb1-4(6S)GlcNAcb-Sp8                                                                                                                    | 17 | 10 |
| Gala1-3Galb1-3GlcNAcb1-2Mana-Sp0                                                                                                                 | 17 | 11 |
| GlcNAcb1-6(Galb1-4GlcNAcb1-3)Galb1-4GlcNAc-                                                                                                      | 17 | 4  |
| (6S)(4S)GalNAcb1-4GlcNAc-Sp8                                                                                                                     | 17 | 9  |
| Gala1-3(Fuca1-2)Galb1-4Glc-Sp0                                                                                                                   | 17 | 22 |
| Neu5Aca2-3Galb1-4GlcNAcb1-3Galb1-4(Fuca1-                                                                                                        | 17 | 15 |
| Neu5Aca2-6Galb1-4GlcNAcb1-2Man-Sp0                                                                                                               | 17 | 12 |
| GalNAca1-3(Fuca1-2)Galb1-3GalNAca1-3(Fuca1-2)Galb1-4GlcNAcb-Sp0                                                                                  | 17 | 18 |
| Galb1-3GlcNAcb1-3Galb1-4GlcNAcb1-6(Galb1-3GlcNAcb1-3)Galb1-4Glc-Sp0                                                                              | 16 | 13 |
| Mana1-6(Mana1-3)Mana1-6(Mana1-3)Manb-                                                                                                            | 16 | 10 |
| Neu5Aca2-6Galb1-4GlcNAcb1-3Galb1-4GlcNAcb1-2Mana1-6(Neu5Aca2-6Galb1-4GlcNAcb1-3Galb1-4GlcNAcb1-2Mana1-                                           | 16 | 9  |
| Galb1-4GlcNAcb1-3Galb1-4GlcNAcb1-3Galb1-4GlcNAcb1-6(Galb1-4GlcNAcb1-3Galb1-4GlcNAcb1-3Galb1-4GlcNAcb1-3Galb1-4GlcNAcb1-2Mana1-3)Manb1-4GlcNAcb1- | 16 | 8  |
| GlcNAcb1-6(GlcNAcb1-3)GalNAca-Sp14                                                                                                               | 16 | 17 |
| Neu5Aca2-3Galb1-4GlcNAcb-Sp8                                                                                                                     | 16 | 7  |
| Galb1-4GlcNAcb-Sp0                                                                                                                               | 16 | 20 |
| Gala1-3GalNAca-Sp8                                                                                                                               | 16 | 21 |
| Neu5Aca2-6Galb-Sp8                                                                                                                               | 16 | 8  |
| Fuca1-2(6S)Galb1-3GlcNAcb-Sp0                                                                                                                    | 16 | 12 |
| Neu5Aca2-3Galb1-4(Fuca1-3)GlcNAcb1-3Galb1-4(Fuca1-3)GlcNAcb1-3Galb1-4(Fuca1-3)GlcNAcb-                                                           | 16 | 11 |
| (3S)Galb1-4(6S)GlcNAcb-Sp8                                                                                                                       | 16 | 10 |
| Fuca1-2Galb1-3GalNAcb1-3Gala1-4Galb1-4Glc-                                                                                                       | 16 | 12 |

|                                                                                                                                                                                                                                                                                                  |    |    |
|--------------------------------------------------------------------------------------------------------------------------------------------------------------------------------------------------------------------------------------------------------------------------------------------------|----|----|
| Galb1-4GlcNAcb1-3Galb1-4GlcNAcb1-3Galb1-4GlcNAcb1-3Galb1-4GlcNAcb1-6(Galb1-4GlcNAcb1-3Galb1-4GlcNAcb1-3Galb1-4GlcNAcb1-3Galb1-4GlcNAcb1-2)Mana1-6(Galb1-4GlcNAcb1-3Galb1-4GlcNAcb1-3Galb1-4GlcNAcb1-3Galb1-4GlcNAcb1-2)Mana1-                                                                    | 16 | 8  |
| Neu5Aca2-6GalNAcb1-4(6S)GlcNAcb-Sp8                                                                                                                                                                                                                                                              | 16 | 16 |
| (4S)Galb1-4GlcNAcb-Sp8                                                                                                                                                                                                                                                                           | 16 | 25 |
| Fuca1-2Galb1-4GlcNAcb1-3Galb1-4GlcNAcb1-3Galb1-4GlcNAcb-Sp0                                                                                                                                                                                                                                      | 16 | 21 |
| Neu5Gca2-8Neu5Aca2-3Galb1-4GlcNAcb-Sp0                                                                                                                                                                                                                                                           | 16 | 19 |
| Galb1-4GlcNAcb1-3Galb1-4GlcNAcb1-3Galb1-4GlcNAcb1-3Galb1-4GlcNAcb1-3Galb1-4GlcNAcb1-6(Galb1-4GlcNAcb1-3Galb1-4GlcNAcb1-3Galb1-4GlcNAcb1-3Galb1-4GlcNAcb1-3Galb1-4GlcNAcb1-3Galb1-4GlcNAcb1-2)Mana1-6(Galb1-4GlcNAcb1-3Galb1-4GlcNAcb1-3Galb1-4GlcNAcb1-3Galb1-4GlcNAcb1-3Galb1-4GlcNAcb1-3Galb1- | 16 | 6  |
| Mana1-2Mana1-6(Mana1-2Mana1-3)Mana-Sp9                                                                                                                                                                                                                                                           | 15 | 13 |
| Neu5Aca2-6Galb1-4GlcNAcb1-3Galb1-4(Fuca1-3)GlcNAcb1-3Galb1-4(Fuca1-3)GlcNAcb-Sp0                                                                                                                                                                                                                 | 15 | 14 |
| (6S)Galb1-4(6S)Glc-Sp8                                                                                                                                                                                                                                                                           | 15 | 11 |
| Neu5Aca2-3Galb1-3(6S)GlcNAcb-Sp8                                                                                                                                                                                                                                                                 | 15 | 14 |
| GlcNAcb1-3Galb1-4GlcNAcb-Sp8                                                                                                                                                                                                                                                                     | 15 | 13 |
| Neu5Aca2-8Neu5Aca2-3Galb1-3GalNAcb1-4(Neu5Aca2-3)Galb1-4Glc-Sp21                                                                                                                                                                                                                                 | 15 | 13 |
| Fuca1-2Galb1-4GlcNAcb1-2Mana1-6(Fuca1-2Galb1-4GlcNAcb1-2Mana1-3)Manb1-                                                                                                                                                                                                                           | 15 | 21 |
| Neu5Gca2-3Galb1-4Glc-Sp0                                                                                                                                                                                                                                                                         | 15 | 21 |
| Gala1-3Galb1-4GlcNAcb1-2Mana1-6(Gala1-3Galb1-4GlcNAcb1-2Mana1-3)Manb1-                                                                                                                                                                                                                           | 15 | 11 |
| Galb1-4GlcNAcb1-6GalNAcb-Sp14                                                                                                                                                                                                                                                                    | 15 | 14 |
| GlcAb-Sp8                                                                                                                                                                                                                                                                                        | 15 | 13 |
| GlcNAcb1-2Mana1-6(GlcNAcb1-4)(GlcNAcb1-4(GlcNAcb1-2)Mana1-3)Manb1-4GlcNAcb1-                                                                                                                                                                                                                     | 15 | 15 |
| Fucb1-3GlcNAcb-Sp8                                                                                                                                                                                                                                                                               | 15 | 7  |
| Galb1-3GlcNAcb-Sp0                                                                                                                                                                                                                                                                               | 15 | 8  |

|                                                                                                                       |    |    |
|-----------------------------------------------------------------------------------------------------------------------|----|----|
| Galb1-4GlcNAcb-Sp23                                                                                                   | 15 | 14 |
| Fuca1-2(6S)Galb1-4(6S)GlcB-Sp0                                                                                        | 15 | 11 |
| GlcNAcb1-6(Galb1-3)GalNAca-Sp8                                                                                        | 15 | 10 |
| KDNa2-3Galb1-4GlcNAcb-Sp0                                                                                             | 14 | 11 |
| Galb1-4GlcNAcb-Sp8                                                                                                    | 14 | 7  |
| Gala1-4Galb1-4GlcNAcb-Sp0                                                                                             | 14 | 7  |
| (3S)Galb1-3(Fuca1-4)GlcNAcb-Sp0                                                                                       | 14 | 15 |
| Fuca1-4GlcNAcb-Sp8                                                                                                    | 14 | 6  |
| Neu5Aca2-6Galb1-4GlcNAcb1-6GalNAca-Sp14                                                                               | 14 | 7  |
| GlcNAcb1-4Galb1-4GlcNAcb-Sp8                                                                                          | 14 | 8  |
| (6S)(4S)Galb1-4GlcNAcb-Sp0                                                                                            | 14 | 11 |
| Neu5Aca2-6GalNAca-Sp8                                                                                                 | 14 | 7  |
| Neu5Aca2-6GlcNAcb1-4GlcNAcb1-4GlcNAc-                                                                                 | 14 | 10 |
| GlcNAcb1-6(GlcNAcb1-3)GalNAca-Sp8                                                                                     | 14 | 6  |
| Galb1-4GlcNAcb1-6(Galb1-4GlcNAcb1-2)Mana1-6(Galb1-4GlcNAcb1-4(Galb1-4GlcNAcb1-2)Mana1-3)Manb1-4GlcNAcb1-4GlcNAcb-Sp21 | 14 | 10 |
| GlcNAcb1-2Galb1-3GalNAca-Sp8                                                                                          | 14 | 12 |
| GlcNAca1-3Galb1-4GlcNAcb-Sp8                                                                                          | 14 | 7  |
| GlcNAcb-Sp0                                                                                                           | 14 | 11 |
| Gala1-3Galb1-3GlcNAcb1-2Mana1-6(Gala1-3Galb1-3GlcNAcb1-2Mana1-3)Manb1-                                                | 14 | 12 |
| Galb1-3Galb-Sp8                                                                                                       | 14 | 9  |
| GlcAb1-6Galb-Sp8                                                                                                      | 14 | 11 |
| Galb1-3(Fuca1-4)GlcNAcb1-3Galb1-3(Fuca1-                                                                              | 14 | 15 |
| Neu5Aca2-3Galb1-4GlcNAcb1-3Galb1-4GlcNAcb-                                                                            | 14 | 11 |
| Manb1-4GlcNAcb-Sp0                                                                                                    | 14 | 9  |
| Galb1-4GlcNAcb1-6GalNAca-Sp8                                                                                          | 14 | 16 |
| Neu5Acb2-6Galb1-4GlcNAcb-Sp8                                                                                          | 14 | 8  |
| (6S)Galb1-3(6S)GlcNAc-Sp0                                                                                             | 14 | 6  |
| GlcNAcb1-3Galb1-4GlcNAcb1-2Mana1-6(GlcNAcb1-3Galb1-4GlcNAcb1-2Mana1-                                                  | 14 | 4  |
| Galb1-4GlcNAcb1-2Mana-Sp0                                                                                             | 14 | 5  |
| GlcNAcb1-6(GlcNAcb1-4)(GlcNAcb1-3)GlcNAc-                                                                             | 14 | 9  |
| GlcNAcb1-2Mana1-6(GlcNAcb1-2Mana1-3)Manb1-4GlcNAcb1-4GlcNAcb-Sp13                                                     | 14 | 15 |

|                                                                                                                                                    |    |    |
|----------------------------------------------------------------------------------------------------------------------------------------------------|----|----|
| Neu5Aca2-6Galb1-4GlcNAcb1-4Mana1-6(GlcNAcb1-4)(Neu5Aca2-6Galb1-4GlcNAcb1-4(Neu5Aca2-6Galb1-4GlcNAcb1-2)Mana1-                                      | 14 | 15 |
| Mana1-6(Mana1-2Mana1-3)Mana1-6(Mana1-2Mana1-3)Manb1-4GlcNAcb1-4GlcNAcb-Sp12                                                                        | 14 | 12 |
| (3S)Galb1-4GlcNAcb-Sp8                                                                                                                             | 13 | 7  |
| Neu5Aca2-8Neu5Gca2-3Galb1-4GlcNAc-Sp0                                                                                                              | 13 | 3  |
| GalNAca1-3(Fuca1-2)Galb1-4GlcNAcb1-3Galb1-4GlcNAcb1-3Galb1-4GlcNAcb-Sp0                                                                            | 13 | 10 |
| Neu5Aca-Sp11                                                                                                                                       | 13 | 15 |
| Neu5Aca2-3Galb1-3GlcNAcb-Sp0                                                                                                                       | 13 | 17 |
| Neu5Gca2-3Galb1-3(Fuca1-4)GlcNAcb-Sp0                                                                                                              | 13 | 10 |
| GalNAca1-3GalNAcb1-3Gala1-4Galb1-4GlcNAcb-                                                                                                         | 13 | 6  |
| Fuca1-2Galb1-3GalNAca1-3(Fuca1-2)Galb1-                                                                                                            | 13 | 18 |
| Fuca1-2Galb1-4(Fuca1-3)GlcNAcb1-3Galb1-4(Fuca1-3)GlcNAcb-Sp0                                                                                       | 13 | 10 |
| Neu5Aca2-6Galb1-4GlcNAcb-Sp8                                                                                                                       | 13 | 10 |
| Gala1-3(Fuca1-2)Galb1-4GlcNAcb1-6GalNAca-                                                                                                          | 13 | 18 |
| Gala1-4Galb1-4GlcNAcb1-2Mana1-6(Gala1-4Galb1-4GlcNAcb1-2Mana1-3)Manb1-                                                                             | 13 | 6  |
| (6S)GlcNAcb-Sp8                                                                                                                                    | 13 | 12 |
| Galb1-6Galb-Sp10                                                                                                                                   | 13 | 13 |
| Neu5Aca2-3Galb1-3(Fuca1-4)GlcNAcb1-3Galb1-4(Fuca1-3)GlcNAcb-Sp0                                                                                    | 13 | 11 |
| Galb1-3GalNAcb1-4Galb1-4Glc-Sp8                                                                                                                    | 13 | 8  |
| Neu5Gca2-8Neu5Gca2-3Galb1-4GlcNAcb1-3Galb1-4GlcNAc-Sp0                                                                                             | 13 | 3  |
| Neu5Aca2-3Galb1-4GlcNAcb1-6(Neu5Aca2-3Galb1-4GlcNAcb1-2)Mana1-6(GlcNAcb1-4)(Neu5Aca2-3Galb1-4GlcNAcb1-4(Neu5Aca2-3Galb1-4GlcNAcb1-2)Mana1-3)Manb1- | 13 | 6  |
| Neu5Aca2-3Galb1-3GalNAcb1-3Gala1-4Galb1-                                                                                                           | 13 | 2  |
| GalNAcb1-3Galb-Sp8                                                                                                                                 | 13 | 14 |
| Gala1-4Galb1-4GlcNAcb-Sp8                                                                                                                          | 13 | 7  |
| Neu5Aca2-6Galb1-4Glc-Sp8                                                                                                                           | 13 | 4  |

|                                                                                                                                                                                                         |    |    |
|---------------------------------------------------------------------------------------------------------------------------------------------------------------------------------------------------------|----|----|
| GlcNAcb1-3Galb1-4GlcNAcb1-3Galb1-4GlcNAcb1-3Galb1-4GlcNAcb1-6(GlcNAcb1-3Galb1-4GlcNAcb1-3Galb1-4GlcNAcb1-3Galb1-4GlcNAcb1-2)Mana1-6(GlcNAcb1-3Galb1-4GlcNAcb1-3Galb1-4GlcNAcb1-3Galb1-4GlcNAcb1-3Galb1- | 13 | 6  |
| GlcNAcb1-3Galb1-4GlcNAcb1-3Galb1-4GlcNAcb1-2Mana1-6(GlcNAcb1-3Galb1-4GlcNAcb1-3Galb1-4GlcNAcb1-2Mana1-                                                                                                  | 13 | 8  |
| KDNa2-3Galb1-4Glc-Sp0                                                                                                                                                                                   | 13 | 4  |
| Glcb-Sp8                                                                                                                                                                                                | 13 | 17 |
| (3S)Galb1-4(6S)Glcb-Sp8                                                                                                                                                                                 | 13 | 5  |
| GlcNAcb1-6(GlcNAcb1-4)GalNAca-Sp8                                                                                                                                                                       | 13 | 5  |
| Mana1-2Mana1-3Mana-Sp9                                                                                                                                                                                  | 13 | 9  |
| GlcAb1-3Galb-Sp8                                                                                                                                                                                        | 13 | 10 |
| Mana1-6(Mana1-3)Manb1-4GlcNAcb1-4GlcNAcb-Glca1-6Glca1-6Glca1-6Glcb-Sp10                                                                                                                                 | 13 | 8  |
| Neu5Aca2-6Galb1-4GlcNAcb1-6(Neu5Aca2-6Galb1-4GlcNAcb1-2)Mana1-6(GlcNAcb1-4)(Neu5Aca2-6Galb1-4GlcNAcb1-2Mana1-                                                                                           | 13 | 24 |
| Neu5Aca2-6Galb1-4GlcNAcb1-6(Galb1-                                                                                                                                                                      | 13 | 7  |
| Neu5Aca2-3Galb1-4GlcNAcb1-2Mana1-6(Neu5Aca2-3Galb1-4GlcNAcb1-2Mana1-3)Manb1-4GlcNAcb1-4(Fuca1-6)GlcNAcb-Sp24                                                                                            | 13 | 6  |
| Gala1-3(Fuca1-2)Galb1-3GalNAcb-Sp8                                                                                                                                                                      | 12 | 9  |
| Neu5Aca2-3Galb1-4(6S)GlcNAcb-Sp8                                                                                                                                                                        | 12 | 8  |
| (6P)Galb1-4GlcNAcb-SP0                                                                                                                                                                                  | 12 | 10 |
| Neu5Aca2-3(6S)Galb1-4GlcNAcb-Sp8                                                                                                                                                                        | 12 | 5  |
| Fuca1-2Galb1-4GlcNAcb1-2Mana1-6(Fuca1-2Galb1-4GlcNAcb1-2Mana1-3)Manb1-                                                                                                                                  | 12 | 13 |
| Fuca1-2Galb1-3(Fuca1-4)GlcNAcb-Sp8                                                                                                                                                                      | 12 | 9  |
| KDNa2-3Galb1-4(Fuca1-3)GlcNAc-Sp0                                                                                                                                                                       | 12 | 7  |
| Neu5Aca2-8Neu5Aca2-3Galb1-4Glcb-Sp0                                                                                                                                                                     | 12 | 14 |
| Fuca1-2Galb1-4GlcNAcb1-3Galb1-4GlcNAcb-                                                                                                                                                                 | 12 | 18 |
| Neu5Aca2-6Galb1-4GlcNAcb-Sp0                                                                                                                                                                            | 12 | 7  |
| GalNAca1-3(Fuca1-2)Galb-Sp18                                                                                                                                                                            | 12 | 14 |
| Galb1-3(6S)GlcNAcb-Sp8                                                                                                                                                                                  | 12 | 14 |
| Galb1-4GlcNAcb1-6(Galb1-3)GalNAca-Sp8                                                                                                                                                                   | 12 | 2  |

|                                                                                                                                          |    |    |
|------------------------------------------------------------------------------------------------------------------------------------------|----|----|
| GalNAca1-3(Fuca1-2)Galb1-3GlcNAcb1-                                                                                                      | 12 | 14 |
| Galb1-3Galb1-4GlcNAcb-Sp8                                                                                                                | 12 | 10 |
| (4S)GalNAcb-Sp10                                                                                                                         | 12 | 8  |
| (6P)Glc-Sp10                                                                                                                             | 12 | 10 |
| Gala1-3(Fuca1-2)Galb1-4GlcNAcb1-2Mana-Sp0                                                                                                | 12 | 6  |
| GlcAb1-3GlcNAcb-Sp8                                                                                                                      | 12 | 8  |
| Galb1-4GlcNAcb1-6Galb1-4GlcNAcb-Sp0                                                                                                      | 12 | 3  |
| GlcNAcb1-2Mana1-6(GlcNAcb1-2Mana1-3)Manb1-4GlcNAcb1-4GlcNAcb-Sp12                                                                        | 12 | 12 |
| Neu5Aca2-6Galb1-4GlcNAcb1-2Mana1-6(Galb1-4GlcNAcb1-2Mana1-3)Manb1-4GlcNAcb1-                                                             | 12 | 11 |
| GlcNAcb1-2Mana1-6(GlcNAcb1-2Mana1-3)Manb1-4GlcNAcb1-4(Fuca1-6)GlcNAcb-Sp22                                                               | 12 | 12 |
| GlcNAcb1-3Man-Sp10                                                                                                                       | 12 | 7  |
| GalNAcb1-4Galb1-4Glc-Sp0                                                                                                                 | 12 | 8  |
| Fuca1-2Galb1-4GlcNAcb1-6(Fuca1-2Galb1-4GlcNAcb1-3)GalNAc-Sp14                                                                            | 12 | 20 |
| Mana1-2Mana1-6(Mana1-2Mana1-3)Mana1-6(Mana1-2Mana1-2Mana1-3)Manb1-4GlcNAcb1-                                                             | 12 | 5  |
| Galb1-4Galb-Sp10                                                                                                                         | 12 | 4  |
| GalNAcb1-4(Neu5Aca2-3)Galb1-4GlcNAcb-Sp0                                                                                                 | 12 | 13 |
| Fuca1-2Galb1-4GlcNAcb1-2Mana-Sp0                                                                                                         | 12 | 8  |
| Neu5Aca2-6Galb1-4GlcNAcb1-2Mana1-6Manb1-4GlcNAcb1-4GlcNAc-Sp12                                                                           | 12 | 17 |
| (3S)Galb1-3GalNAca-Sp8                                                                                                                   | 12 | 13 |
| GlcNAcb1-3Galb1-4GlcNAcb1-3Galb1-4GlcNAcb1-3Galb1-4GlcNAcb1-3Galb1-4GlcNAcb1-2Mana1-6(GlcNAcb1-3Galb1-4GlcNAcb1-3Galb1-4GlcNAcb1-3Galb1- | 12 | 5  |
| Neu5Aca2-3Galb1-3GlcNAcb1-2Mana-Sp0                                                                                                      | 12 | 7  |
| Neu5Aca2-3Galb1-4(Fuca1-3)GlcNAcb1-                                                                                                      | 12 | 10 |
| Neu5Aca2-3Galb1-4GlcNAcb1-2Mana1-6(Neu5Aca2-3Galb1-4GlcNAcb1-2Mana1-                                                                     | 11 | 11 |
| Mana1-6(Mana1-3)Manb1-4GlcNAcb1-4(Fuca1-                                                                                                 | 11 | 3  |
| GlcNAcb1-3Galb1-4GlcNAcb1-6(GlcNAcb1-3)Galb1-4GlcNAc-Sp0                                                                                 | 11 | 7  |
| Galb1-3GalNAca-Sp14                                                                                                                      | 11 | 3  |



|                                                                                                                                                               |    |    |
|---------------------------------------------------------------------------------------------------------------------------------------------------------------|----|----|
| GlcNAcb1-3Galb1-4GlcNAcb1-3Galb1-4GlcNAcb-<br>Galb1-3GlcNAcb1-6Galb1-4GlcNAcb-Sp0                                                                             | 11 | 10 |
| Neu5Gca2-6GalNAca-Sp0                                                                                                                                         | 11 | 13 |
| Neu5Gca2-6GalNAca-Sp0                                                                                                                                         | 11 | 20 |
| Gala1-3(Fuca1-2)Galb1-3GalNAcb1-3Gala1-<br>Neu5Gca2-8Neu5Gca2-3Galb1-4GlcNAc-Sp0                                                                              | 11 | 8  |
| Neu5Gca2-8Neu5Gca2-3Galb1-4GlcNAc-Sp0                                                                                                                         | 11 | 11 |
| Neu5Aca2-3Galb1-4GlcNAcb1-6GalNAca-Sp14                                                                                                                       | 11 | 12 |
| Neu5Gca2-3Galb1-4(Fuca1-3)GlcNAcb-Sp0                                                                                                                         | 11 | 7  |
| Gala1-3(Fuca1-2)Galb-Sp8                                                                                                                                      | 11 | 5  |
| Neu5Aca2-3Galb1-4GlcNAcb1-3Galb1-<br>4GlcNAcb1-6(Neu5Aca2-3Galb1-4GlcNAcb1-<br>Galb1-4Glc-Sp8                                                                 | 11 | 12 |
| Galb1-4Glc-Sp8                                                                                                                                                | 11 | 3  |
| KDNa2-3Galb1-3GalNAca-Sp14                                                                                                                                    | 11 | 2  |
| GlcNAcb1-2 Mana1-6(GlcNAcb1-4)(GlcNAcb1-<br>2Mana1-3)Manb1-4GlcNAcb1-4(Fuca1-6)GlcNAc-<br>Fuca1-4(Galb1-3)GlcNAcb-Sp8                                         | 11 | 14 |
| Fuca1-4(Galb1-3)GlcNAcb-Sp8                                                                                                                                   | 11 | 19 |
| Gala1-4(Gala1-3)Galb1-4GlcNAcb-Sp8                                                                                                                            | 11 | 16 |
| Galb1-4GlcNAcb1-3Galb1-4GlcNAcb1-6(Galb1-<br>4GlcNAcb1-3Galb1-4GlcNAcb1-3)GalNAca-Sp14                                                                        | 11 | 8  |
| GlcNAcb1-3Galb1-4GlcNAcb1-6(GlcNAcb1-<br>3Galb1-3)GalNAca-Sp14                                                                                                | 11 | 8  |
| Neu5Aca2-3Galb1-4GlcNAcb1-3Galb1-<br>4GlcNAcb1-3Galb1-4GlcNAcb-Sp0                                                                                            | 11 | 11 |
| Neu5Aca2-6Galb1-4GlcNAcb1-2Mana1-<br>6(Neu5Aca2-6Galb1-4GlcNAcb1-2Mana1-<br>GlcNAcb1-2(GlcNAcb1-6)Mana1-6(GlcNAcb1-<br>2Mana1-3)Manb1-4GlcNAcb1-4GlcNAcb-Sp19 | 11 | 10 |
| 2Mana1-3)Manb1-4GlcNAcb1-4GlcNAcb-Sp19                                                                                                                        | 11 | 5  |
| Neu5Gca2-3Galb1-4GlcNAcb-Sp0                                                                                                                                  | 11 | 8  |
| Galb1-4GlcNAcb1-2Mana1-6(GlcNAcb1-4)(Galb1-<br>4GlcNAcb1-4(Galb1-4GlcNAcb1-2)Mana1-<br>3)Manb1-4GlcNAcb1-4GlcNAc-Sp21                                         | 11 | 4  |
| 3)Manb1-4GlcNAcb1-4GlcNAc-Sp21                                                                                                                                | 11 | 4  |
| Neu5Aca2-3Galb1-3(6S)GalNAca-Sp8                                                                                                                              | 11 | 15 |
| Neu5Gca2-6Galb1-4GlcNAcb-Sp0                                                                                                                                  | 10 | 18 |
| Fuca1-2Galb1-3GalNAcb1-4(Neu5Aca2-3)Galb1-<br>Galb1-4GlcNAcb1-6(Fuca1-4(Fuca1-2Galb1-<br>3)GlcNAcb1-3)Galb1-4Glc-Sp21                                         | 10 | 4  |
| Galb1-4GlcNAcb1-6(Fuca1-4(Fuca1-2Galb1-<br>3)GlcNAcb1-3)Galb1-4Glc-Sp21                                                                                       | 10 | 5  |
| (3S)Galb1-3GlcNAcb-Sp8                                                                                                                                        | 10 | 11 |
| Gala1-3(Fuca1-2)Galb1-4(Fuca1-3)Glc-Sp21                                                                                                                      | 10 | 6  |

|                                                                                                                                                    |    |    |
|----------------------------------------------------------------------------------------------------------------------------------------------------|----|----|
| Galb1-3GlcNAcb-Sp8                                                                                                                                 | 10 | 7  |
| Neu5Aca2-3Galb1-3GlcNAcb1-6GalNAca-Sp14                                                                                                            | 10 | 9  |
| GlcNAcb1-3Galb1-4GlcNAcb1-6(GlcNAcb1-3Galb1-4GlcNAcb1-2)Mana1-6(GlcNAcb1-3Galb1-4GlcNAcb1-2Man a1-3)Manb1-4GlcNAcb1-                               | 10 | 15 |
| Galb1-4GlcNAcb1-3Galb1-3GlcNAcb-Sp0                                                                                                                | 10 | 8  |
| Galb1-4GlcNAcb1-3Galb1-4Glc-Sp8                                                                                                                    | 10 | 5  |
| Galb1-4GlcNAcb1-3Galb1-4GlcNAcb1-2Mana1-6(Galb1-4GlcNAcb1-3Galb1-4GlcNAcb1-2Mana1-3)Manb1-4GlcNAcb1-4GlcNAcb-Sp12                                  | 10 | 6  |
| Glc-Sp8                                                                                                                                            | 10 | 6  |
| Mana1-2Mana1-6(Mana1-3)Mana1-6(Mana1-2Mana1-2Mana1-3)Manb1-4GlcNAcb1-4GlcNAcb-                                                                     | 10 | 7  |
| GlcNAcb1-6GalNAca-Sp8                                                                                                                              | 10 | 2  |
| Gala1-3Galb1-4Glc-Sp0                                                                                                                              | 10 | 9  |
| Galb1-4GlcNAcb1-2 Mana1-6(Galb1-4GlcNAcb1-4)(Galb1-4GlcNAcb1-2Mana1-3)Manb1-4GlcNAcb1-4(Fuca1-6)GlcNAc-Sp21                                        | 10 | 3  |
| (3S)Galb1-4(Fuca1-3)GlcNAc-Sp0                                                                                                                     | 10 | 8  |
| (3S)Galb1-4Glc-Sp8                                                                                                                                 | 10 | 3  |
| Fuca1-2Galb1-3(6S)GlcNAcb-Sp0                                                                                                                      | 10 | 3  |
| Neu5Aca2-6Galb1-4GlcNAcb1-6(Neu5Aca2-6Galb1-4GlcNAcb1-2)Mana1-6(GlcNAcb1-4)(Neu5Aca2-6Galb1-4GlcNAcb1-4(Neu5Aca2-6Galb1-4GlcNAcb1-2)Mana1-3)Manb1- | 10 | 6  |
| (3S)GalNAcb1-4GlcNAc-Sp8                                                                                                                           | 10 | 10 |
| Gala1-3(Fuca1-2)Galb1-3GlcNAcb-Sp0                                                                                                                 | 10 | 13 |
| GlcNAcb1-3Galb1-3GalNAca-Sp8                                                                                                                       | 10 | 6  |
| Galb1-3GlcNAcb1-6(Galb1-3)GalNAc-Sp14                                                                                                              | 10 | 5  |
| Galb1-4Glc-Sp0                                                                                                                                     | 10 | 1  |
| (6S)Galb1-4Glc-Sp0                                                                                                                                 | 10 | 10 |
| GlcNAcb1-3GalNAca-Sp14                                                                                                                             | 10 | 6  |
| Neu5Aca2-3Galb1-3GlcNAcb1-3Galb1-3GlcNAcb-                                                                                                         | 10 | 6  |
| Neu5Aca2-6Galb1-4GlcNAcb1-6(Fuca1-2Galb1-4(Fuca1-3)GlcNAcb1-3)Galb1-4Glc-Sp21                                                                      | 10 | 10 |
| GalNAcb1-4GlcNAcb1-3GalNAcb1-4GlcNAcb-                                                                                                             | 10 | 8  |
| GalNAca1-3GalNAcb-Sp8                                                                                                                              | 10 | 7  |

|                                                                                                                                          |    |    |
|------------------------------------------------------------------------------------------------------------------------------------------|----|----|
| GalNAca-Sp15                                                                                                                             | 10 | 3  |
| Neu5Aca2-6Galb1-4GlcNAcb1-2Mana1-6(Neu5Aca2-6Galb1-4GlcNAcb1-2Mana1-3)Manb1-4GlcNAcb1-4(Fuca1-6)GlcNAcb-Sp24                             | 10 | 6  |
| GlcNAcb1-6(Galb1-3)GalNAca-Sp14                                                                                                          | 10 | 3  |
| Neu5Aca2-3Galb1-3GalNAca-Sp14                                                                                                            | 10 | 5  |
| Gala1-3Galb1-4GlcNAcb-Sp8                                                                                                                | 9  | 9  |
| GlcNAcb1-3Galb1-4GlcNAcb-Sp0                                                                                                             | 9  | 4  |
| Neu5Aca2-6Galb1-4GlcNAcb1-3Galb1-4GlcNAcb1-3Galb1-4GlcNAcb1-2Mana1-6(Neu5Aca2-6Galb1-4GlcNAcb1-3Galb1-4GlcNAcb1-3Galb1-4GlcNAcb1-2Mana1- | 9  | 6  |
| Fuca1-2Galb1-3(Fuca1-4)GlcNAcb1-2Mana1-6(Fuca1-2Galb1-3(Fuca1-4)GlcNAcb1-2Mana1-3)Manb1-4GlcNAcb1-4(Fuca1-6)GlcNAcb1-                    | 9  | 3  |
| Galb1-4GlcNAcb1-2Mana1-3Manb1-4GlcNAcb1-                                                                                                 | 9  | 4  |
| Mana1-6(Mana1-3)Mana1-6(Mana1-2Mana1-3)Manb1-4GlcNAcb1-4GlcNAcb-Sp12                                                                     | 9  | 13 |
| Gala1-3(Fuca1-2)Galb1-4(Fuca1-3)GlcNAcb1-                                                                                                | 9  | 3  |
| GlcAa-Sp8                                                                                                                                | 9  | 5  |
| Glca1-6Glca1-6Glc-Sp8                                                                                                                    | 9  | 10 |
| Neu5Aca2-6(Galb1-3)GlcNAcb1-4Galb1-4Glc-Sp8                                                                                              | 9  | 6  |
| Mana1-2Mana1-6(Mana1-3)Mana1-6(Mana1-2Mana1-2Mana1-3)Mana-Sp9                                                                            | 9  | 12 |
| GalNAca1-3(Fuca1-2)Galb1-3GlcNAcb-Sp0                                                                                                    | 9  | 7  |
| Neu5Aca2-6Galb1-4GlcNAcb1-3Galb1-4GlcNAcb1-6(Neu5Aca2-6Galb1-4GlcNAcb1-                                                                  | 9  | 6  |
| Neu5Aca2-3Galb1-3GalNAcb1-4Galb1-4Glc-Sp8                                                                                                | 9  | 5  |
| Glca1-4Glca1-4Glca1-4Glc-Sp10                                                                                                            | 9  | 2  |
| Neu5Aca2-3Galb1-4GlcNAcb1-6(Neu5Aca2-3Galb1-4GlcNAcb1-2)Mana1-6(GlcNAcb1-4)(Neu5Aca2-3Galb1-4GlcNAcb1-2Mana1-                            | 9  | 5  |
| Neu5Acb2-6(Galb1-3)GalNAca-Sp8                                                                                                           | 9  | 7  |



|                                                                                                                      |   |    |
|----------------------------------------------------------------------------------------------------------------------|---|----|
| Neu5Aca2-6Galb1-4GlcNAcb1-6(Fuca1-2Galb1-3GlcNAcb1-3)Galb1-4Glc-Sp21                                                 | 8 | 7  |
| Galb1-4GalNAcb1-3(Fuca1-2)Galb1-4GlcNAcb-6S(3S)Galb1-4(6S)GlcNAcb-Sp0                                                | 8 | 5  |
| (3S)Galb1-3GlcNAcb-Sp0                                                                                               | 8 | 7  |
| Mana1-2Mana1-2Mana1-6(Mana1-3)Mana-Sp9                                                                               | 8 | 11 |
| GlcNAcb1-6Galb1-4GlcNAcb-Sp8                                                                                         | 8 | 7  |
| GalNAcb1-4GlcNAcb-Sp8                                                                                                | 8 | 10 |
| Galb1-3GlcNAcb1-2Mana1-6(Galb1-3GlcNAcb1-2Mana1-3)Manb1-4GlcNAcb1-4GlcNAcb-Sp19                                      | 8 | 5  |
| Galb1-4GlcNAcb1-2Mana1-6(GlcNAcb1-4)(Galb1-4GlcNAcb1-2Mana1-3)Manb1-4GlcNAcb1-                                       | 8 | 3  |
| GalNAca1-3(Fuca1-2)Galb1-4GlcNAcb1-2Mana1-6(GalNAca1-3(Fuca1-2)Galb1-4GlcNAcb1-2Mana1-3)Manb1-4GlcNAcb1-4(Fuca1-     | 8 | 3  |
| Gala1-4GlcNAcb-Sp8                                                                                                   | 8 | 3  |
| GalNAcb1-3(Fuca1-2)Galb-Sp8                                                                                          | 8 | 5  |
| GalNAca1-3(Fuca1-2)Galb1-4Glc-Sp0                                                                                    | 8 | 6  |
| Galb1-4GlcNAcb1-3Galb1-4GlcNAcb1-6(Galb1-                                                                            | 8 | 3  |
| Fuca1-2Galb1-3GlcNAcb1-6(Fuca1-2Galb1-3GlcNAcb1-3)GalNAca-Sp14                                                       | 8 | 4  |
| Gala1-3GalNAca-Sp16                                                                                                  | 8 | 3  |
| GalNAca1-3(Fuca1-2)Galb1-4GlcNAcb1-                                                                                  | 8 | 11 |
| Gala1-4(Fuca1-2)Galb1-4GlcNAcb-Sp8                                                                                   | 8 | 9  |
| GlcNAcb1-6(Neu5Aca2-3Galb1-3)GalNAca-Sp14                                                                            | 8 | 7  |
| Fuca1-3GlcNAcb1-6(Galb1-4GlcNAcb1-3)Galb1-                                                                           | 8 | 8  |
| GalNAcb1-4GlcNAcb1-2Mana-Sp0                                                                                         | 8 | 8  |
| Mana-Sp8                                                                                                             | 8 | 8  |
| GalNAca1-3(Fuca1-2)Galb1-4 GlcNAcb1-2Mana-                                                                           | 8 | 4  |
| Galb1-4GlcNAcb1-3Galb1-4GlcNAcb1-3Galb1-4GlcNAcb1-2Mana1-6(Galb1-4GlcNAcb1-3Galb1-4GlcNAcb1-3Galb1-4GlcNAcb1-2Mana1- | 8 | 1  |
| Neu5Aca2-8Neu5Acb-Sp17                                                                                               | 8 | 8  |
| Fuca1-4(Galb1-3)GlcNAcb1-2Mana1-6(Fuca1-4(Galb1-3)GlcNAcb1-2Mana1-3)Manb1-4GlcNAcb1-4(Fuca1-6)GlcNAcb-Sp22           | 7 | 7  |
| Galb1-4GlcNAcb1-3Galb1-4GlcNAcb-Sp0                                                                                  | 7 | 6  |

|                                                                                                                                                                          |   |    |
|--------------------------------------------------------------------------------------------------------------------------------------------------------------------------|---|----|
| Fuca1-2Galb1-3GlcNAcb1-3Galb1-4Glc-<br>Sp8                                                                                                                               | 7 | 1  |
| Galb1-4GlcNAcb1-3Galb1-4GlcNAcb1-3Galb1-<br>4GlcNAcb1-3Galb1-4GlcNAcb1-2Mana1-6(Galb1-<br>4GlcNAcb1-3Galb1-4GlcNAcb1-3Galb1-<br>4GlcNAcb1-3Galb1-4GlcNAcb1-2Mana1-       | 7 | 4  |
| Fuca1-2Galb1-4Glc-<br>Sp0                                                                                                                                                | 7 | 4  |
| GalNAca1-3(Fuca1-2)Galb1-4(Fuca1-3)GlcNAcb1-<br>3GalNAc-Sp14                                                                                                             | 7 | 2  |
| Neu5Aca2-6Galb1-4(6S)GlcNAcb-Sp8                                                                                                                                         | 7 | 4  |
| Neu5Aca2-8Neu5Aca2-3Galb1-4GlcNAc-Sp0                                                                                                                                    | 7 | 5  |
| Neu5Aca2-3Galb1-4GlcNAcb1-2Mana1-<br>6(GlcNAcb1-4)(Neu5Aca2-3Galb1-4GlcNAcb1-<br>2Mana1-3)Manb1-4GlcNAcb1-4GlcNAcb-Sp21                                                  | 7 | 7  |
| GlcNAcb1-4GlcNAcb1-4GlcNAcb1-4GlcNAcb1-                                                                                                                                  | 7 | 5  |
| Neu5Aca2-3Galb1-4(Fuca1-3)GlcNAcb1-3Galb1-                                                                                                                               | 7 | 5  |
| Gala1-3Galb1-3GlcNAcb1-6GalNAca-Sp14                                                                                                                                     | 7 | 6  |
| Neu5Aca2-6Galb1-4GlcNAcb1-2Mana1-<br>6(Neu5Aca2-6Galb1-4GlcNAcb1-2Mana1-                                                                                                 | 7 | 17 |
| Neu5Aca2-6Galb1-4GlcNAcb1-2Mana1-6(Mana1-<br>3)Manb1-4GlcNAcb1-4GlcNAc-Sp12                                                                                              | 7 | 10 |
| Fuca1-2Galb1-3GlcNAcb-Sp8                                                                                                                                                | 7 | 18 |
| Gala1-3(Fuca1-2)Galb1-4(Fuca1-3)GlcNAcb-Sp0                                                                                                                              | 7 | 7  |
| Galb1-4GlcNAcb1-3Galb1-4GlcNAcb1-3Galb1-<br>4GlcNAcb1-2Mana1-6(Galb1-4GlcNAcb1-3Galb1-<br>4GlcNAcb1-3Galb1-4GlcNAcb1-2Mana1-<br>3)Manb1-4GlcNAcb1-4(Fuca1-6)GlcNAcb-Sp24 | 7 | 5  |
| Galb1-3GlcNAcb1-3Galb1-4Glc-<br>Sp10                                                                                                                                     | 7 | 7  |
| Fuca1-4(Fuca1-2Galb1-3)GlcNAcb1-2Mana1-<br>3(Fuca1-4(Fuca1-2Galb1-3)GlcNAcb1-2Mana1-<br>3)Manb1-4GlcNAcb1-4GlcNAcb-Sp19                                                  | 7 | 9  |
| Fuca1-2Galb1-4(Fuca1-3)GlcNAcb-Sp0                                                                                                                                       | 7 | 5  |
| Galb1-3GlcNAcb1-6GalNAca-Sp14                                                                                                                                            | 7 | 2  |
| Galb1-2Galb-Sp8                                                                                                                                                          | 7 | 6  |
| Galb1-3GlcNAcb1-6(Galb1-3GlcNAcb1-2)Mana1-<br>6(Galb1-3GlcNAcb1-2Mana1-3)Manb1-                                                                                          | 7 | 5  |
| Gala1-3GalNAcb-Sp8                                                                                                                                                       | 7 | 5  |
| GalNAcb1-4GlcNAcb-Sp0                                                                                                                                                    | 7 | 13 |

|                                                                                                                                                                                             |   |    |
|---------------------------------------------------------------------------------------------------------------------------------------------------------------------------------------------|---|----|
| Neu5Aca2-8Neu5Aca-Sp8                                                                                                                                                                       | 7 | 6  |
| Galb1-4GlcNAcb1-2Mana1-6(GlcNAcb1-2Mana1-3)Manb1-4GlcNAcb1-4GlcNAc-Sp12                                                                                                                     | 7 | 4  |
| Gala1-3(Fuca1-2)Galb1-4GlcNAc-Sp0                                                                                                                                                           | 7 | 6  |
| Galb1-4(Fuca1-3)GlcNAcb1-3Galb1-4(Fuca1-                                                                                                                                                    | 7 | 4  |
| Gala1-3(Fuca1-2)Galb1-3GlcNAcb-Sp8                                                                                                                                                          | 7 | 3  |
| Gala1-4Galb1-4GlcNAcb1-3Galb1-4Glc-Sp0                                                                                                                                                      | 7 | 8  |
| GalNAcb1-4(Neu5Aca2-8Neu5Aca2-3)Galb1-                                                                                                                                                      | 7 | 17 |
| Neu5Aca2-6Galb1-4GlcNAcb1-2Mana1-3Manb1-4GlcNAcb1-4GlcNAc-Sp12                                                                                                                              | 7 | 9  |
| Neu5Aca2-3Galb1-3GalNAcb1-4(Neu5Aca2-                                                                                                                                                       | 7 | 8  |
| GlcNAcb1-3Galb1-4GlcNAcb1-3GalNAca-Sp14                                                                                                                                                     | 7 | 10 |
| Neu5Aca2-3Galb1-3GlcNAcb1-6(Neu5Aca2-3Galb1-3GlcNAcb1-2)Mana1-6(Neu5Aca2-3Galb1-3GlcNAcb1-2Mana1-3)Manb1-                                                                                   | 7 | 11 |
| Galb1-4GlcNAcb1-3GalNAca-Sp8                                                                                                                                                                | 7 | 7  |
| Galb1-3GlcNAcb1-3Galb1-4GlcNAcb1-3Galb1-4GlcNAcb1-6(Galb1-3GlcNAcb1-3Galb1-4GlcNAcb1-3Galb1-4GlcNAcb1-2)Mana1-6(Galb1-3GlcNAcb1-3Galb1-4GlcNAcb1-3Galb1-4GlcNAcb1-2Mana1-3)Manb1-4GlcNAcb1- | 7 | 3  |
| (6S)Galb1-4Glc-Sp8                                                                                                                                                                          | 7 | 12 |
| Fuca1-2(6S)Galb1-4GlcNAcb-Sp0                                                                                                                                                               | 7 | 3  |
| Neu5Aca2-3Galb1-4GlcNAcb1-6(Neu5Aca2-3Galb1-3)GalNAca-Sp14                                                                                                                                  | 7 | 3  |
| GalNAcb1-3Gala1-4Galb1-4GlcNAcb1-3Galb1-                                                                                                                                                    | 6 | 5  |
| GlcNAcb1-6(GlcNAcb1-2)Mana1-6(GlcNAcb1-4)(GlcNAcb1-4(GlcNAcb1-2)Mana1-3)Manb1-4GlcNAcb1-4(Fuca1-6)GlcNAc-Sp21                                                                               | 6 | 7  |
| Neu5Aca2-6Galb1-4GlcNAcb1-3Galb1-4GlcNAcb1-6(Galb1-3)GalNAca-Sp14                                                                                                                           | 6 | 9  |
| Neu5Aca2-3Galb1-4GlcNAcb1-3Galb1-4GlcNAcb1-2Mana1-6(Neu5Aca2-3Galb1-4GlcNAcb1-3Galb1-4GlcNAcb1-2Mana1-                                                                                      | 6 | 5  |
| Fuca1-2Galb1-4(Fuca1-3)GlcNAcb1-3Galb1-4(Fuca1-3)GlcNAcb1-3Galb1-4(Fuca1-3)GlcNAcb1-                                                                                                        | 6 | 5  |
| GalNAcb1-4(Neu5Aca2-3)Galb1-4GlcNAcb-Sp8                                                                                                                                                    | 6 | 3  |

|                                                                                                                         |   |    |
|-------------------------------------------------------------------------------------------------------------------------|---|----|
| Neu5Aca2-6Galb1-4GlcNAcb1-2Mana1-6(GlcNAcb1-4)(Neu5Aca2-6Galb1-4GlcNAcb1-2Mana1-3)Manb1-4GlcNAcb1-4GlcNAcb-Sp21         | 6 | 3  |
| Neu5Aca2-3GalNAcb1-4GlcNAcb-Sp0                                                                                         | 6 | 4  |
| GalNAca1-3(Fuca1-2)Galb1-3GalNAcb1-3Gala1-4Galb1-4Glc-Sp21                                                              | 6 | 6  |
| Fuca1-2Galb1-4GlcNAcb1-2Mana1-6(Fuca1-2Galb1-4GlcNAcb1-2(Fuca1-2Galb1-4GlcNAcb1-4)Mana1-3)Manb1-4GlcNAcb1-4GlcNAcb-Sp12 | 6 | 5  |
| GalNAca1-3(Fuca1-2)Galb1-4GlcNAcb1-6GalNAcb1-4GlcNAcb1-6(Galb1-4GlcNAcb1-3)Galb1-                                       | 6 | 6  |
| (6S)Galb1-4(6S)GlcNAcb-Sp0                                                                                              | 6 | 5  |
| Gala1-4Galb1-4Glc-Sp0                                                                                                   | 6 | 7  |
| Gala1-4Galb1-4Glc-Sp0                                                                                                   | 6 | 5  |
| GalNAca1-3(Fuca1-2)Galb1-4GlcNAcb1-3Galb1-                                                                              | 6 | 4  |
| Neu5Aca2-6(Galb1-3)GalNAca-Sp14                                                                                         | 6 | 13 |
| Gala1-3Galb1-4(Fuca1-3)GlcNAcb-Sp8                                                                                      | 6 | 1  |
| Neu5Aca2-3Galb1-3GalNAca-Sp8                                                                                            | 6 | 12 |
| Neu5Aca2-3Galb-Sp8                                                                                                      | 6 | 3  |
| Galb1-3GlcNAcb1-3GalNAca-Sp14                                                                                           | 6 | 4  |
| Fuca1-2Galb1-3GalNAca-Sp8                                                                                               | 6 | 7  |
| Neu5,9Ac <sub>2</sub> a-Sp8                                                                                             | 6 | 15 |
| GalNAcb1-3GalNAca-Sp8                                                                                                   | 6 | 5  |
| GlcNAcb1-6(GlcNAcb1-2)Mana1-6(GlcNAcb1-4)(GlcNAcb1-2Mana1-3)Manb1-4GlcNAcb1-                                            | 6 | 9  |
| GalNAca1-4(Fuca1-2)Galb1-4GlcNAcb-Sp8                                                                                   | 6 | 3  |
| Neu5Aca2-3Galb1-4GlcNAcb1-3Galb1-3GlcNAcb-                                                                              | 6 | 6  |
| Neu5Gcb2-6Galb1-4GlcNAcb-Sp8                                                                                            | 6 | 5  |
| Neu5Aca2-3Galb1-4GlcNAcb1-2Mana1-6(Neu5Aca2-6Galb1-4GlcNAcb1-2Mana1-                                                    | 6 | 3  |
| Mana1-2Mana1-6(Mana1-2Mana1-3)Mana1-6(Mana1-2Mana1-2Mana1-3)Mana-Sp9                                                    | 6 | 11 |
| Galb1-4(Fuca1-3)GlcNAcb-Sp8                                                                                             | 6 | 4  |
| Galb1-3GlcNAcb1-3Galb1-4(Fuca1-3)GlcNAcb1-6(Galb1-3GlcNAcb1-3)Galb1-4Glc-Sp21                                           | 6 | 2  |
| Neu5Aca2-3Galb1-4GlcNAcb1-3Galb1-4GlcNAcb1-3GalNAca-Sp14                                                                | 6 | 9  |
| Manb-Sp8                                                                                                                | 6 | 3  |



|                                                                                                                 |   |    |
|-----------------------------------------------------------------------------------------------------------------|---|----|
| Galb1-4GlcNAcb1-2Mana1-6(Mana1-3)Manb1-4GlcNAcb1-4GlcNAcb-Sp12                                                  | 6 | 2  |
| Neu5Aca2-8Neu5Aca2-3Galb1-3GalNAcb1-4(Neu5Aca2-8Neu5Aca2-3)Galb1-4Glc-Sp0                                       | 6 | 3  |
| Neu5,9Ac2a2-6Galb1-4GlcNAcb-Sp8                                                                                 | 6 | 8  |
| Fuca1-2Galb1-4GlcNAcb1-3GalNAca-Sp14                                                                            | 6 | 7  |
| (6S)Galb1-4GlcNAcb-Sp8                                                                                          | 5 | 4  |
| Fuca1-4(Galb1-3)GlcNAcb1-2 Mana-Sp0                                                                             | 5 | 5  |
| Glca-Sp8                                                                                                        | 5 | 7  |
| Gala1-3Galb1-4GlcNAcb1-2Mana1-6(Gala1-3Galb1-4GlcNAcb1-2Mana1-3)Manb1-                                          | 5 | 4  |
| Fuca1-2Galb1-4(Fuca1-3)GlcNAcb1-2Mana1-6(Fuca1-2Galb1-4(Fuca1-3)GlcNAcb1-2Mana1-3)Manb1-4GlcNAcb1-4GlcNAcb-Sp20 | 5 | 5  |
| Fuca1-2Galb1-3GlcNAcb-Sp0                                                                                       | 5 | 9  |
| GlcNAcb1-4GlcNAcb1-4GlcNAcb-Sp8                                                                                 | 5 | 4  |
| Galb1-4(6S)Glc-Sp8                                                                                              | 5 | 1  |
| Galb1-4(Fuca1-3)GlcNAcb1-6(Neu5Aca2-6(Neu5Aca2-3Galb1-3)GlcNAcb1-3)Galb1-4Glc-                                  | 5 | 3  |
| Fuca1-2Galb1-3GalNAcb1-4(Neu5Aca2-3)Galb1-                                                                      | 5 | 10 |
| Neu5Gca2-3Galb1-4GlcNAcb1-3Galb1-4GlcNAcb1-2Mana1-6(Neu5Gca2-3Galb1-4GlcNAcb1-3Galb1-4GlcNAcb1-2Mana1-          | 5 | 7  |
| Galb1-3GlcNAcb1-3Galb1-4GlcNAcb-Sp0                                                                             | 5 | 4  |
| GlcNAcb1-3Galb1-4GlcNAcb1-6(Galb1-                                                                              | 5 | 6  |
| Neu5Aca2-3Galb1-4(Fuca1-3)GlcNAcb1-6(Galb1-3)GalNAca-Sp14                                                       | 5 | 3  |
| Galb1-4GlcNAcb1-6(Galb1-4GlcNAcb1-3)GalNAc-                                                                     | 5 | 6  |
| Neu5Aca2-6Galb1-4 GlcNAcb1-6(Neu5Aca2-6Galb1-4GlcNAcb1-3)GalNAca-Sp14                                           | 5 | 11 |
| Galb1-4GalNAca1-3(Fuca1-2)Galb1-4GlcNAcb-                                                                       | 5 | 4  |
| Galb1-3GlcNAcb1-3Galb1-4(Fuca1-3)GlcNAcb-                                                                       | 5 | 3  |
| Neu5Aca2-6Galb1-4GlcNAcb1-3Galb1-4GlcNAcb1-3Galb1-4GlcNAcb-Sp0                                                  | 5 | 9  |
| Galb1-4GlcNAcb1-2Mana1-6(Galb1-4GlcNAcb1-2Mana1-3)Manb1-4GlcNAcb1-4GlcNAcb-Sp12                                 | 5 | 2  |

|                                                                                |   |    |
|--------------------------------------------------------------------------------|---|----|
| Galb1-4GlcNAcb1-3Galb1-4(Fuca1-3)GlcNAcb1-3Galb1-4(Fuca1-3)GlcNAcb-Sp0         | 5 | 6  |
| Galb1-4GlcNAcb1-2 Mana1-6(GlcNAcb1-4)(Galb1-4GlcNAcb1-2Mana1-3)Manb1-          | 5 | 4  |
| Neu5Aca2-3Galb1-3GlcNAcb1-3Galb1-4GlcNAcb-                                     | 5 | 2  |
| Neu5Aca2-3(6S)Galb1-4(Fuca1-3)GlcNAcb-Sp8                                      | 5 | 2  |
| Galb1-4(Fuca1-3)GlcNAcb1-2Mana-Sp0                                             | 5 | 6  |
| Galb1-4GlcNAcb1-6(Galb1-4GlcNAcb1-2)Mana1-6(Galb1-4GlcNAcb1-2Mana1-3)Manb1-    | 5 | 3  |
| Galb1-4GlcNAcb1-2Mana1-6(Galb1-4GlcNAcb1-4)(Galb1-4GlcNAcb1-2)Mana1-3)Manb1-   | 5 | 6  |
| Gala1-3(Fuca1-2)Galb1-3GalNAca-Sp8                                             | 5 | 6  |
| GlcNAcb1-6(GlcNAcb1-2)Mana1-6(GlcNAcb1-4)(GlcNAcb1-4(GlcNAcb1-2)Mana1-3)Manb1- | 5 | 1  |
| Neu5Aca2-3Galb1-4Glc-Sp0                                                       | 5 | 3  |
| Fuca1-2Galb1-3GalNAca-Sp14                                                     | 5 | 9  |
| Fuca1-2Galb1-3GalNAcb1-3Gala-Sp9                                               | 5 | 8  |
| GalNAcb1-4(Neu5Aca2-8Neu5Aca2-8Neu5Aca2-8Neu5Aca2-3)Galb1-4Glc-Sp0             | 5 | 3  |
| Neu5Aca2-6Galb1-4GlcNAcb1-2Mana1-6(Neu5Aca2-6Galb1-4GlcNAcb1-2Man-a1-          | 5 | 5  |
| GalNAca1-3(Fuca1-2)Galb1-4GlcNAcb1-6(GalNAca1-3(Fuca1-2)Galb1-4GlcNAcb1-       | 4 | 3  |
| Neu5Aca2-6Galb1-4GlcNAcb1-3Galb1-4GlcNAcb1-3GalNAca-Sp14                       | 4 | 6  |
| GalNAcb1-4(6S)GlcNAc-Sp8                                                       | 4 | 3  |
| Galb1-4(Fuca1-3)GlcNAcb1-6(Fuca1-4(Fuca1-2Galb1-3)GlcNAcb1-3)Galb1-4Glc-Sp21   | 4 | 11 |
| Gala1-6Glc-Sp8                                                                 | 4 | 4  |
| Mana1-6(Mana1-3)Mana1-6(Mana1-3)Manb1-4GlcNAcb1-4GlcNAcb-Sp12                  | 4 | 3  |
| Neu5Aca2-3Galb1-4GlcNAcb1-3GalNAc-Sp14                                         | 4 | 9  |
| Galb1-4GlcNAcb1-2Mana1-6(Neu5Aca2-6Galb1-4GlcNAcb1-2Mana1-3)Manb1-4GlcNAcb1-   | 4 | 9  |
| Glca1-4Glca-Sp8                                                                | 4 | 5  |
| Galb1-3GalNAcb1-4(Neu5Aca2-8Neu5Aca2-                                          | 4 | 7  |
| Fuca1-2Galb-Sp8                                                                | 4 | 4  |

|                                                                                                                  |   |    |
|------------------------------------------------------------------------------------------------------------------|---|----|
| Galb1-3GalNAca-Sp16                                                                                              | 4 | 3  |
| GlcNAcb1-2Mana1-6(Galb1-4GlcNAcb1-2Mana1-3)Manb1-4GlcNAcb1-4GlcNAc-Sp12                                          | 4 | 14 |
| Neu5,9Ac2a2-3Galb1-3GlcNAcb-Sp0                                                                                  | 4 | 1  |
| Gala1-3(Fuca1-2)Galb1-3GlcNAcb1-6GalNAc-                                                                         | 4 | 2  |
| Neu5Aca2-6Galb1-4GlcNAcb1-3GalNAc-Sp14                                                                           | 4 | 5  |
| Fuca1-2Galb1-4(Fuca1-3)GlcNAcb1-3GalNAca-                                                                        | 4 | 6  |
| (3S)Galb1-4GlcNAcb-Sp0                                                                                           | 4 | 2  |
| Neu5Aca2-6GalNAcb1-4GlcNAcb-Sp0                                                                                  | 4 | 2  |
| GalNAcb1-3GlcNAcb-Sp0                                                                                            | 4 | 3  |
| (6S)GalNAcb1-4GlcNAc-Sp8                                                                                         | 4 | 6  |
| GalNAcb1-4GlcNAcb1-2Mana1-6(GalNAcb1-4GlcNAcb1-2Mana1-3)Manb1-4GlcNAcb1-                                         | 4 | 2  |
| GalNAcb1-6GalNAcb-Sp8                                                                                            | 4 | 3  |
| Fuca1-2Galb1-4(Fuca1-3)GlcNAcb-Sp8                                                                               | 4 | 4  |
| Gala1-3(Fuca1-2)Galb-Sp18                                                                                        | 4 | 3  |
| GalNAcb1-3Gala1-6Galb1-4Glc-Sp8                                                                                  | 4 | 7  |
| GalNAca1-3(Fuca1-2)Galb1-3GlcNAcb1-2Mana1-6(GalNAca1-3(Fuca1-2)Galb1-3GlcNAcb1-2Mana1-3)Manb1-4GlcNAcb1-4(Fuca1- | 4 | 6  |
| Galb1-3GalNAca-Sp8                                                                                               | 3 | 4  |
| GalNAcb1-4(Fuca1-3)(6S)GlcNAcb-Sp8                                                                               | 3 | 3  |
| Gala1-3Galb1-4GlcNAcb1-2Mana-Sp0                                                                                 | 3 | 3  |
| (3S)Galb-Sp8                                                                                                     | 3 | 2  |
| Gala1-3Galb1-4GlcNAcb1-3GalNAca-Sp14                                                                             | 3 | 1  |
| Gala1-3(Fuca1-2)Galb1-4GlcNAcb1-2Mana1-6(Gala1-3(Fuca1-2)Galb1-4GlcNAcb1-2Mana1-3)Manb1-4GlcNAcb1-4GlcNAcb-Sp20  | 3 | 2  |
| Galb1-4GlcNAcb1-3Galb1-4GlcNAcb1-3Galb1-                                                                         | 3 | 4  |
| Fuca1-2Galb1-3GlcNAcb1-3Galb1-4Glc-Sp10                                                                          | 3 | 4  |
| GalNAcb1-4(Neu5Aca2-3)Galb1-4Glc-Sp0                                                                             | 3 | 3  |
| GlcNAcb1-6GalNAca-Sp14                                                                                           | 3 | 3  |
| Galb1-3GalNAca1-3(Fuca1-2)Galb1-4Glc-Sp0                                                                         | 3 | 1  |
| (6S)GlcNAcb1-3Galb1-4GlcNAcb-Sp0                                                                                 | 3 | 4  |
| GlcNAcb1-4GlcNAcb-Sp12                                                                                           | 3 | 3  |
| Neu5Aca2-3Galb1-4(Fuca1-3)GlcNAcb-Sp8                                                                            | 3 | 6  |
| Neu5Aca2-6(Neu5Aca2-3Galb1-3)GalNAca-Sp14                                                                        | 3 | 4  |

|                                                                                                                       |   |   |
|-----------------------------------------------------------------------------------------------------------------------|---|---|
| GalNAcb1-4(Neu5Aca2-3)Galb1-4GlcNAcb1-                                                                                | 3 | 3 |
| GalNAca1-3(Fuca1-2)Galb-Sp8                                                                                           | 3 | 8 |
| GlcNAcb-Sp8                                                                                                           | 3 | 5 |
| Galb1-4(Fuca1-3)GlcNAcb1-2Mana1-6(Galb1-4(Fuca1-3)GlcNAcb1-2Mana1-3)Manb1-                                            | 3 | 5 |
| Fuca1-2Galb1-4GlcNAcb-Sp8                                                                                             | 3 | 6 |
| Galb1-3GalNAcb1-4(Neu5Aca2-3)Galb1-4Glc-                                                                              | 3 | 2 |
| GalNAca1-3(Fuca1-2)Galb1-4GlcNAcb-Sp0                                                                                 | 3 | 5 |
| GalNAcb-Sp8                                                                                                           | 2 | 5 |
| GalNAca1-3(Fuca1-2)Galb1-4GlcNAcb-Sp8                                                                                 | 2 | 1 |
| Glc1-4Glc-Sp8                                                                                                         | 2 | 3 |
| Fuca1-3GlcNAcb-Sp8                                                                                                    | 2 | 4 |
| Galb1-4GlcNAcb1-6(Galb1-4GlcNAcb1-2)Mana1-6(Galb1-4GlcNAcb1-2Mana1-3)Manb1-4GlcNAcb1-4(Fuca1-6)GlcNAcb-Sp24           | 2 | 2 |
| Galb1-3GlcNAca1-6Galb1-4GlcNAcb-Sp0                                                                                   | 2 | 4 |
| Galb-Sp8                                                                                                              | 2 | 6 |
| GalNAca1-3GalNAcb1-3Gala1-4Galb1-4Glc-Sp0                                                                             | 2 | 2 |
| Neu5Aca2-6(Galb1-3)GalNAca-Sp8                                                                                        | 2 | 5 |
| Neu5Aca2-3Galb1-4(Fuca1-3)GlcNAcb1-3Galb-                                                                             | 2 | 3 |
| GalNAca1-3Galb-Sp8                                                                                                    | 2 | 7 |
| Galb1-3GlcNAcb1-3Galb1-4GlcNAcb1-2Mana1-6(Galb1-3GlcNAcb1-3Galb1-4GlcNAcb1-2Mana1-3)Manb1-4GlcNAcb1-4GlcNAc-Sp25      | 2 | 4 |
| GalNAca1-3(Fuca1-2)Galb1-3GlcNAcb1-2Mana1-6(GalNAca1-3(Fuca1-2)Galb1-3GlcNAcb1-2Mana1-3)Manb1-4GlcNAcb1-4GlcNAcb-Sp20 | 2 | 7 |
| Galb1-4GlcNAcb1-3Galb1-4Glc-Sp0                                                                                       | 1 | 3 |
| 4S(3S)Galb1-4GlcNAcb-Sp0                                                                                              | 1 | 4 |
| GalNAca1-3(Fuca1-2)Galb1-4(Fuca1-3)GlcNAcb-                                                                           | 1 | 4 |
| GalNAcb1-4(Neu5Aca2-8Neu5Aca2-8Neu5Aca2-3)Galb1-4Glc-Sp0                                                              | 1 | 4 |
| Mana1-2Mana1-2Mana1-3Mana-Sp9                                                                                         | 1 | 6 |
| Neu5Aca2-3Galb1-4(Fuca1-3)GlcNAcb-Sp0                                                                                 | 1 | 3 |
| Mana1-6(Mana1-3)Mana-Sp9                                                                                              | 1 | 5 |
| Neu5Aca-Sp8                                                                                                           | 0 | 5 |

|                                                                       |   |   |
|-----------------------------------------------------------------------|---|---|
| Neu5Aca2-6Galb1-4GlcNAcb1-2Mana1-6(GlcNAcb1-2Mana1-3)Manb1-4GlcNAcb1- | 0 | 4 |
| Gala1-3Galb-Sp8                                                       | 0 | 3 |
